# Supplementary material
Source: publisher site journal article supplement (https://www.spandidos-publications.com/3297/downloadSupplementary)
Supplement: Supplementary file 1 [file downloadSupplementary]

## Sheet: Supp2-hsa_circ_IPCE1
Table SII.Predicted ceRNA genes of hsa_circ_IPCE1.
SeqName	GeneSymbol	GeneType	CeNames	CeSymbols	CeTypes	Pvalues	FDR	Rank	CommonMirnasNum	SeqMirnasNum	SeqMirnaCoverage	CeMirnasNum	CeMirnaCoverage	AllMirnasNum	CommonMirnas
hsa_circ_IPCE1	hsa_circ_IPCE1	circRNA	NM_020695	REXO1	protein_coding	0.000124111	0.00258542	3235	18	134	0.134328	134	0.134328	2588	hsa-miR-5589-5p,hsa-miR-608,hsa-miR-4298,hsa-miR-16-5p,hsa-miR-15a-5p,hsa-miR-6838-5p,hsa-miR-4505,hsa-miR-15b-5p,hsa-miR-4710,hsa-miR-5787,hsa-miR-497-5p,hsa-miR-4676-3p,hsa-miR-4291,hsa-miR-4689,hsa-miR-452-5p,hsa-miR-424-5p,hsa-miR-6077,hsa-miR-1302
hsa_circ_IPCE1	hsa_circ_IPCE1	circRNA	NM_017504	OR2M4	protein_coding	1.54245e-06	0.000131608	787	23	134	0.171642	152	0.151316	2588	hsa-miR-3619-5p,hsa-miR-3691-5p,hsa-miR-4752,hsa-miR-6858-5p,hsa-miR-6842-5p,hsa-miR-16-5p,hsa-miR-3692-3p,hsa-miR-195-5p,hsa-miR-15a-5p,hsa-miR-6838-5p,hsa-miR-6876-5p,hsa-miR-552-3p,hsa-miR-766-5p,hsa-miR-15b-5p,hsa-miR-3605-5p,hsa-miR-497-5p,hsa-miR-761,hsa-miR-4689,hsa-miR-214-3p,hsa-miR-4530,hsa-miR-4476,hsa-miR-6752-5p,hsa-miR-7110-5p
hsa_circ_IPCE1	hsa_circ_IPCE1	circRNA	NM_015457	ZDHHC5	protein_coding	3.43028e-06	0.000221765	1043	27	134	0.201493	207	0.130435	2588	hsa-miR-4298,hsa-miR-4533,hsa-miR-6891-3p,hsa-miR-4685-5p,hsa-miR-6876-5p,hsa-miR-4505,hsa-miR-3173-3p,hsa-miR-9500,hsa-miR-370-3p,hsa-miR-6891-5p,hsa-miR-7113-5p,hsa-miR-5787,hsa-miR-3074-5p,hsa-miR-4512,hsa-miR-6077,hsa-miR-3918,hsa-miR-6072,hsa-miR-4779,hsa-miR-4711-3p,hsa-miR-6837-5p,hsa-miR-4530,hsa-miR-4476,hsa-miR-7152-5p,hsa-miR-3692-5p,hsa-miR-1302,hsa-miR-6873-3p,hsa-miR-6893-3p
hsa_circ_IPCE1	hsa_circ_IPCE1	circRNA	NM_001005197	OR8D4	protein_coding	4.32143e-06	0.000262312	1111	20	134	0.149254	127	0.15748	2588	hsa-miR-3691-5p,hsa-miR-6776-5p,hsa-miR-3681-5p,hsa-miR-4701-3p,hsa-miR-216a-3p,hsa-miR-552-3p,hsa-miR-3134,hsa-miR-6736-5p,hsa-miR-640,hsa-miR-4710,hsa-miR-889-5p,hsa-miR-510-5p,hsa-miR-3605-5p,hsa-miR-922,hsa-miR-4530,hsa-miR-892a,hsa-miR-3681-3p,hsa-miR-6752-5p,hsa-miR-6849-5p,hsa-miR-7110-5p
hsa_circ_IPCE1	hsa_circ_IPCE1	circRNA	NM_001080835	PRR21	protein_coding	2.00156e-09	1.95788e-06	69	19	134	0.141791	74	0.256757	2588	hsa-miR-3691-5p,hsa-miR-16-5p,hsa-miR-195-5p,hsa-miR-15a-5p,hsa-miR-4701-3p,hsa-miR-1262,hsa-miR-6838-5p,hsa-miR-3166,hsa-miR-4742-5p,hsa-miR-6736-5p,hsa-miR-766-5p,hsa-miR-15b-5p,hsa-miR-370-3p,hsa-miR-497-5p,hsa-miR-424-5p,hsa-miR-6077,hsa-miR-4476,hsa-miR-1257,hsa-miR-6893-3p
hsa_circ_IPCE1	hsa_circ_IPCE1	circRNA	NM_145295	ZNF627	protein_coding	4.38305e-09	2.98675e-06	99	29	134	0.216418	173	0.16763	2588	hsa-miR-4314,hsa-miR-3691-5p,hsa-miR-6776-5p,hsa-miR-4752,hsa-miR-6895-3p,hsa-miR-6858-5p,hsa-miR-4646-5p,hsa-miR-16-5p,hsa-miR-195-5p,hsa-miR-15a-5p,hsa-miR-501-5p,hsa-miR-4701-3p,hsa-miR-216a-3p,hsa-miR-6838-5p,hsa-miR-432-3p,hsa-miR-3134,hsa-miR-6736-5p,hsa-miR-766-5p,hsa-miR-15b-5p,hsa-miR-4710,hsa-miR-204-3p,hsa-miR-497-5p,hsa-miR-4689,hsa-miR-922,hsa-miR-452-5p,hsa-miR-424-5p,hsa-miR-1252-5…
hsa_circ_IPCE1	hsa_circ_IPCE1	circRNA	NM_001276	CHI3L1	protein_coding	8.27676e-05	0.00196126	2843	18	134	0.134328	130	0.138462	2588	hsa-miR-3619-5p,hsa-miR-4685-5p,hsa-miR-6876-5p,hsa-miR-4505,hsa-miR-3173-3p,hsa-miR-125a-3p,hsa-miR-6732-5p,hsa-miR-6891-5p,hsa-miR-5787,hsa-miR-761,hsa-miR-4291,hsa-miR-7114-5p,hsa-miR-214-3p,hsa-miR-4711-3p,hsa-miR-6837-5p,hsa-miR-4476,hsa-miR-892a,hsa-miR-6857-3p
hsa_circ_IPCE1	hsa_circ_IPCE1	circRNA	NM_002346	LY6E	protein_coding	4.58561e-05	0.0012977	2384	20	134	0.149254	148	0.135135	2588	hsa-miR-3619-5p,hsa-miR-608,hsa-miR-6858-5p,hsa-miR-6842-5p,hsa-miR-16-5p,hsa-miR-4685-5p,hsa-miR-6838-5p,hsa-miR-6876-5p,hsa-miR-4505,hsa-miR-7113-5p,hsa-miR-5787,hsa-miR-761,hsa-miR-4689,hsa-miR-3918,hsa-miR-6837-5p,hsa-miR-4476,hsa-miR-4651,hsa-miR-6857-3p,hsa-miR-6752-5p,hsa-miR-7110-5p
hsa_circ_IPCE1	hsa_circ_IPCE1	circRNA	NM_001008404	C14orf180	protein_coding	9.47031e-11	2.13063e-07	30	34	134	0.253731	200	0.17	2588	hsa-miR-3619-5p,hsa-miR-5589-5p,hsa-miR-6895-3p,hsa-miR-6842-5p,hsa-miR-4298,hsa-miR-195-5p,hsa-miR-15a-5p,hsa-miR-4782-3p,hsa-miR-4701-3p,hsa-miR-4646-3p,hsa-miR-1262,hsa-miR-4685-5p,hsa-miR-6838-5p,hsa-miR-432-3p,hsa-miR-4505,hsa-miR-6736-5p,hsa-miR-15b-5p,hsa-miR-370-3p,hsa-miR-889-5p,hsa-miR-5787,hsa-miR-497-5p,hsa-miR-761,hsa-miR-3074-5p,hsa-miR-6766-3p,hsa-miR-424-5p,hsa-miR-3918,hsa-miR-21…
hsa_circ_IPCE1	hsa_circ_IPCE1	circRNA	NM_006946	SPTBN2	protein_coding	1.47188e-06	0.00012986	763	24	134	0.179104	163	0.147239	2588	hsa-miR-3619-5p,hsa-miR-4690-5p,hsa-miR-608,hsa-miR-6842-5p,hsa-miR-16-5p,hsa-miR-195-5p,hsa-miR-15a-5p,hsa-miR-4685-5p,hsa-miR-6838-5p,hsa-miR-4505,hsa-miR-15b-5p,hsa-miR-4710,hsa-miR-6732-5p,hsa-miR-5787,hsa-miR-497-5p,hsa-miR-761,hsa-miR-922,hsa-miR-424-5p,hsa-miR-3918,hsa-miR-214-3p,hsa-miR-4651,hsa-miR-6752-5p,hsa-miR-7110-5p,hsa-miR-4653-5p
hsa_circ_IPCE1	hsa_circ_IPCE1	circRNA	NM_138788	TMEM45B	protein_coding	3.20877e-06	0.000213162	1015	24	134	0.179104	170	0.141176	2588	hsa-miR-3619-5p,hsa-miR-4690-5p,hsa-miR-6894-3p,hsa-miR-6818-3p,hsa-miR-3681-5p,hsa-miR-6895-3p,hsa-miR-6858-5p,hsa-miR-16-5p,hsa-miR-195-5p,hsa-miR-15a-5p,hsa-miR-4668-3p,hsa-miR-501-5p,hsa-miR-6838-5p,hsa-miR-15b-5p,hsa-miR-497-5p,hsa-miR-5089-3p,hsa-miR-424-5p,hsa-miR-1252-5p,hsa-miR-1298-3p,hsa-miR-214-3p,hsa-miR-7152-5p,hsa-miR-6849-5p,hsa-miR-6747-3p,hsa-miR-6841-5p
hsa_circ_IPCE1	hsa_circ_IPCE1	circRNA	NM_007108	TCEB2	protein_coding	9.46544e-07	9.87923e-05	644	22	134	0.164179	137	0.160584	2588	hsa-miR-3619-5p,hsa-miR-4314,hsa-miR-4690-5p,hsa-miR-6818-3p,hsa-miR-6895-3p,hsa-miR-608,hsa-miR-6842-5p,hsa-miR-16-5p,hsa-miR-4646-3p,hsa-miR-6838-5p,hsa-miR-4505,hsa-miR-15b-5p,hsa-miR-5787,hsa-miR-497-5p,hsa-miR-761,hsa-miR-424-5p,hsa-miR-1298-3p,hsa-miR-214-3p,hsa-miR-4651,hsa-miR-6752-5p,hsa-miR-4753-3p,hsa-miR-7110-5p
hsa_circ_IPCE1	hsa_circ_IPCE1	circRNA	NM_145648	SLC15A4	protein_coding	2.50762e-05	0.000861228	1964	21	134	0.156716	154	0.136364	2588	hsa-miR-4298,hsa-miR-16-5p,hsa-miR-195-5p,hsa-miR-15a-5p,hsa-miR-4668-3p,hsa-miR-4533,hsa-miR-6838-5p,hsa-miR-6876-5p,hsa-miR-3120-3p,hsa-miR-4742-5p,hsa-miR-125a-3p,hsa-miR-15b-5p,hsa-miR-889-5p,hsa-miR-497-5p,hsa-miR-761,hsa-miR-922,hsa-miR-1266-3p,hsa-miR-424-5p,hsa-miR-1252-5p,hsa-miR-4476,hsa-miR-1302
hsa_circ_IPCE1	hsa_circ_IPCE1	circRNA	NM_001004466	OR10H5	protein_coding	4.27529e-08	1.21754e-05	237	27	134	0.201493	168	0.160714	2588	hsa-miR-3619-5p,hsa-miR-6776-5p,hsa-miR-608,hsa-miR-6858-5p,hsa-miR-6842-5p,hsa-miR-4533,hsa-miR-4701-3p,hsa-miR-1262,hsa-miR-216a-3p,hsa-miR-6876-5p,hsa-miR-6736-5p,hsa-miR-128-3p,hsa-miR-6732-5p,hsa-miR-3605-5p,hsa-miR-761,hsa-miR-4291,hsa-miR-4689,hsa-miR-922,hsa-miR-4312,hsa-miR-6077,hsa-miR-3918,hsa-miR-214-3p,hsa-miR-4530,hsa-miR-4476,hsa-miR-4651,hsa-miR-6752-5p,hsa-miR-7110-5p
hsa_circ_IPCE1	hsa_circ_IPCE1	circRNA	NM_001001952	OR5D18	protein_coding	2.50762e-05	0.000861228	1965	21	134	0.156716	154	0.136364	2588	hsa-miR-4314,hsa-miR-4647,hsa-miR-6858-5p,hsa-miR-4298,hsa-miR-4662b,hsa-miR-16-5p,hsa-miR-15a-5p,hsa-miR-216a-3p,hsa-miR-6838-5p,hsa-miR-766-5p,hsa-miR-128-3p,hsa-miR-15b-5p,hsa-miR-3605-5p,hsa-miR-497-5p,hsa-miR-4689,hsa-miR-6077,hsa-miR-4530,hsa-miR-6809-5p,hsa-miR-892a,hsa-miR-1302,hsa-miR-6752-5p
hsa_circ_IPCE1	hsa_circ_IPCE1	circRNA	NM_153269	C20orf96	protein_coding	1.1612e-07	2.47236e-05	317	19	134	0.141791	93	0.204301	2588	hsa-miR-4646-5p,hsa-miR-16-5p,hsa-miR-195-5p,hsa-miR-15a-5p,hsa-miR-4533,hsa-miR-6838-5p,hsa-miR-6876-5p,hsa-miR-3173-3p,hsa-miR-766-5p,hsa-miR-15b-5p,hsa-miR-640,hsa-miR-9500,hsa-miR-6891-5p,hsa-miR-204-3p,hsa-miR-497-5p,hsa-miR-6077,hsa-miR-4779,hsa-miR-4530,hsa-miR-4476
hsa_circ_IPCE1	hsa_circ_IPCE1	circRNA	NM_080865	GPR62	protein_coding	5.4227e-06	0.000304746	1200	21	134	0.156716	140	0.15	2588	hsa-miR-3619-5p,hsa-miR-6895-3p,hsa-miR-545-3p,hsa-miR-6842-5p,hsa-miR-3692-3p,hsa-miR-216a-3p,hsa-miR-6876-5p,hsa-miR-3166,hsa-miR-128-3p,hsa-miR-370-3p,hsa-miR-761,hsa-miR-3074-5p,hsa-miR-5586-5p,hsa-miR-1266-3p,hsa-miR-214-3p,hsa-miR-4530,hsa-miR-4476,hsa-miR-3681-3p,hsa-miR-6752-5p,hsa-miR-6893-3p,hsa-miR-7110-5p
hsa_circ_IPCE1	hsa_circ_IPCE1	circRNA	NM_152468	TMC8	protein_coding	1.48627e-12	1.14669e-08	8	46	134	0.343284	306	0.150327	2588	hsa-miR-5589-5p,hsa-miR-4690-5p,hsa-miR-4647,hsa-miR-6776-5p,hsa-miR-608,hsa-miR-6842-5p,hsa-miR-4662b,hsa-miR-16-5p,hsa-miR-195-5p,hsa-miR-15a-5p,hsa-miR-4701-3p,hsa-miR-6891-3p,hsa-miR-145-3p,hsa-miR-1262,hsa-miR-4685-5p,hsa-miR-6838-5p,hsa-miR-6876-5p,hsa-miR-4505,hsa-miR-3173-3p,hsa-miR-6736-5p,hsa-miR-125a-3p,hsa-miR-15b-5p,hsa-miR-370-3p,hsa-miR-6891-5p,hsa-miR-7113-5p,hsa-miR-510-5p,hsa-mi…
hsa_circ_IPCE1	hsa_circ_IPCE1	circRNA	NM_001005325	OR6M1	protein_coding	0.000122612	0.00256767	3218	19	134	0.141791	146	0.130137	2588	hsa-miR-6776-5p,hsa-miR-6818-3p,hsa-miR-6895-3p,hsa-miR-6858-5p,hsa-miR-545-3p,hsa-miR-433-3p,hsa-miR-4646-5p,hsa-miR-6876-5p,hsa-miR-370-3p,hsa-miR-7113-5p,hsa-miR-204-3p,hsa-miR-4689,hsa-miR-922,hsa-miR-4312,hsa-miR-4530,hsa-miR-1257,hsa-miR-7152-5p,hsa-miR-6873-3p,hsa-miR-6893-3p
hsa_circ_IPCE1	hsa_circ_IPCE1	circRNA	NM_014289	CAPN6	protein_coding	5.92563e-09	3.66171e-06	108	39	134	0.291045	293	0.133106	2588	hsa-miR-3619-5p,hsa-miR-5589-5p,hsa-miR-4690-5p,hsa-miR-4647,hsa-miR-3691-5p,hsa-miR-6776-5p,hsa-miR-608,hsa-miR-6858-5p,hsa-miR-6842-5p,hsa-miR-4646-5p,hsa-miR-4662b,hsa-miR-16-5p,hsa-miR-195-5p,hsa-miR-15a-5p,hsa-miR-4701-3p,hsa-miR-1262,hsa-miR-6838-5p,hsa-miR-3173-3p,hsa-miR-6736-5p,hsa-miR-15b-5p,hsa-miR-9500,hsa-miR-6891-5p,hsa-miR-5787,hsa-miR-204-3p,hsa-miR-497-5p,hsa-miR-761,hsa-miR-4689…
hsa_circ_IPCE1	hsa_circ_IPCE1	circRNA	UC002FQM.2	AK127378	protein_coding	1.2001e-06	0.000114084	708	21	134	0.156716	128	0.164062	2588	hsa-miR-3619-5p,hsa-miR-5589-5p,hsa-miR-4690-5p,hsa-miR-6776-5p,hsa-miR-16-5p,hsa-miR-195-5p,hsa-miR-15a-5p,hsa-miR-216a-3p,hsa-miR-6838-5p,hsa-miR-4505,hsa-miR-15b-5p,hsa-miR-6891-5p,hsa-miR-5787,hsa-miR-497-5p,hsa-miR-761,hsa-miR-4291,hsa-miR-424-5p,hsa-miR-214-3p,hsa-miR-4530,hsa-miR-6747-3p,hsa-miR-6893-3p
hsa_circ_IPCE1	hsa_circ_IPCE1	circRNA	ENST00000304311	DPCR1	protein_coding	1.9037e-06	0.000151878	845	27	134	0.201493	201	0.134328	2588	hsa-miR-4647,hsa-miR-608,hsa-miR-6842-5p,hsa-miR-4662b,hsa-miR-4668-3p,hsa-miR-4701-3p,hsa-miR-6891-3p,hsa-miR-4646-3p,hsa-miR-1262,hsa-miR-4685-5p,hsa-miR-3173-3p,hsa-miR-6736-5p,hsa-miR-766-5p,hsa-miR-9500,hsa-miR-6891-5p,hsa-miR-4426,hsa-miR-1252-5p,hsa-miR-6077,hsa-miR-6072,hsa-miR-6837-5p,hsa-miR-7152-5p,hsa-miR-4651,hsa-miR-3692-5p,hsa-miR-6752-5p,hsa-miR-4645-3p,hsa-miR-4753-3p,hsa-miR-711…
hsa_circ_IPCE1	hsa_circ_IPCE1	circRNA	NM_130811	SNAP25	protein_coding	4.32173e-06	0.000262312	1112	23	134	0.171642	161	0.142857	2588	hsa-miR-4752,hsa-miR-608,hsa-miR-545-3p,hsa-miR-6842-5p,hsa-miR-16-5p,hsa-miR-3692-3p,hsa-miR-195-5p,hsa-miR-15a-5p,hsa-miR-28-3p,hsa-miR-6838-5p,hsa-miR-8056,hsa-miR-3120-3p,hsa-miR-766-5p,hsa-miR-15b-5p,hsa-miR-497-5p,hsa-miR-4676-3p,hsa-miR-592,hsa-miR-5089-3p,hsa-miR-452-5p,hsa-miR-424-5p,hsa-miR-7114-5p,hsa-miR-4651,hsa-miR-7110-5p
hsa_circ_IPCE1	hsa_circ_IPCE1	circRNA	NM_052854	CREB3L1	protein_coding	4.86401e-07	6.42449e-05	510	25	134	0.186567	165	0.151515	2588	hsa-miR-3619-5p,hsa-miR-608,hsa-miR-6842-5p,hsa-miR-4646-5p,hsa-miR-16-5p,hsa-miR-195-5p,hsa-miR-15a-5p,hsa-miR-4533,hsa-miR-6838-5p,hsa-miR-6876-5p,hsa-miR-4505,hsa-miR-15b-5p,hsa-miR-9500,hsa-miR-4710,hsa-miR-5787,hsa-miR-204-3p,hsa-miR-497-5p,hsa-miR-424-5p,hsa-miR-6077,hsa-miR-214-3p,hsa-miR-4476,hsa-miR-6809-5p,hsa-miR-4651,hsa-miR-6752-5p,hsa-miR-7110-5p
hsa_circ_IPCE1	hsa_circ_IPCE1	circRNA	NM_001080404	ZNF878	protein_coding	1.07975e-08	5.28091e-06	137	27	134	0.201493	158	0.170886	2588	hsa-miR-4314,hsa-miR-1323,hsa-miR-6776-5p,hsa-miR-3681-5p,hsa-miR-6895-3p,hsa-miR-433-3p,hsa-miR-4646-5p,hsa-miR-4298,hsa-miR-3692-3p,hsa-miR-4533,hsa-miR-501-5p,hsa-miR-4701-3p,hsa-miR-1262,hsa-miR-8056,hsa-miR-6736-5p,hsa-miR-204-3p,hsa-miR-3074-5p,hsa-miR-4676-3p,hsa-miR-592,hsa-miR-452-5p,hsa-miR-6077,hsa-miR-4711-3p,hsa-miR-1302,hsa-miR-892c-3p,hsa-miR-6849-5p,hsa-miR-3921,hsa-miR-4653-5p
hsa_circ_IPCE1	hsa_circ_IPCE1	circRNA	NM_013245	VPS4A	protein_coding	2.12763e-06	0.000161755	886	25	134	0.186567	178	0.140449	2588	hsa-miR-5589-5p,hsa-miR-6776-5p,hsa-miR-6818-3p,hsa-miR-4298,hsa-miR-4662b,hsa-miR-16-5p,hsa-miR-195-5p,hsa-miR-15a-5p,hsa-miR-4668-3p,hsa-miR-1262,hsa-miR-4685-5p,hsa-miR-6838-5p,hsa-miR-4505,hsa-miR-125a-3p,hsa-miR-766-5p,hsa-miR-15b-5p,hsa-miR-5787,hsa-miR-497-5p,hsa-miR-922,hsa-miR-4426,hsa-miR-424-5p,hsa-miR-6077,hsa-miR-4779,hsa-miR-6837-5p,hsa-miR-1302
hsa_circ_IPCE1	hsa_circ_IPCE1	circRNA	NM_001284309	ADAP1	protein_coding	4.61371e-06	0.000273396	1138	22	134	0.164179	150	0.146667	2588	hsa-miR-6776-5p,hsa-miR-15a-5p,hsa-miR-4533,hsa-miR-4685-5p,hsa-miR-216a-3p,hsa-miR-6838-5p,hsa-miR-6876-5p,hsa-miR-4505,hsa-miR-766-5p,hsa-miR-128-3p,hsa-miR-15b-5p,hsa-miR-4710,hsa-miR-5787,hsa-miR-497-5p,hsa-miR-4689,hsa-miR-424-5p,hsa-miR-3918,hsa-miR-6837-5p,hsa-miR-4476,hsa-miR-6809-5p,hsa-miR-3681-3p,hsa-miR-6747-3p
hsa_circ_IPCE1	hsa_circ_IPCE1	circRNA	NM_031289	GSG1	protein_coding	3.56962e-07	5.29512e-05	454	32	134	0.238806	246	0.130081	2588	hsa-miR-5589-5p,hsa-miR-4647,hsa-miR-3691-5p,hsa-miR-4752,hsa-miR-608,hsa-miR-4298,hsa-miR-4662b,hsa-miR-16-5p,hsa-miR-15a-5p,hsa-miR-28-3p,hsa-miR-4701-3p,hsa-miR-1262,hsa-miR-6838-5p,hsa-miR-432-3p,hsa-miR-4505,hsa-miR-6736-5p,hsa-miR-15b-5p,hsa-miR-889-5p,hsa-miR-5787,hsa-miR-497-5p,hsa-miR-4291,hsa-miR-4689,hsa-miR-922,hsa-miR-4426,hsa-miR-424-5p,hsa-miR-1252-5p,hsa-miR-4711-3p,hsa-miR-4651,h…
hsa_circ_IPCE1	hsa_circ_IPCE1	circRNA	NM_001031710	KLHL7	protein_coding	3.28431e-05	0.00103738	2133	19	134	0.141791	133	0.142857	2588	hsa-miR-6837-3p,hsa-miR-4647,hsa-miR-1323,hsa-miR-3681-5p,hsa-miR-6858-5p,hsa-miR-433-3p,hsa-miR-4662b,hsa-miR-4533,hsa-miR-501-5p,hsa-miR-216a-3p,hsa-miR-6876-5p,hsa-miR-8056,hsa-miR-128-3p,hsa-miR-4689,hsa-miR-4426,hsa-miR-1252-5p,hsa-miR-4476,hsa-miR-6857-3p,hsa-miR-6849-5p
hsa_circ_IPCE1	hsa_circ_IPCE1	circRNA	NM_173467	MCAT	protein_coding	1.22975e-05	0.000520543	1588	22	134	0.164179	159	0.138365	2588	hsa-miR-3619-5p,hsa-miR-4690-5p,hsa-miR-608,hsa-miR-6858-5p,hsa-miR-6842-5p,hsa-miR-4701-3p,hsa-miR-4685-5p,hsa-miR-6876-5p,hsa-miR-4742-5p,hsa-miR-6732-5p,hsa-miR-761,hsa-miR-4689,hsa-miR-3918,hsa-miR-214-3p,hsa-miR-6837-5p,hsa-miR-4476,hsa-miR-4504,hsa-miR-4651,hsa-miR-6752-5p,hsa-miR-3921,hsa-miR-7110-5p,hsa-miR-4653-5p
hsa_circ_IPCE1	hsa_circ_IPCE1	circRNA	NM_017602	OTUD5	protein_coding	6.88954e-08	1.71588e-05	271	30	134	0.223881	206	0.145631	2588	hsa-miR-6818-3p,hsa-miR-6895-3p,hsa-miR-608,hsa-miR-6858-5p,hsa-miR-545-3p,hsa-miR-4646-5p,hsa-miR-16-5p,hsa-miR-195-5p,hsa-miR-15a-5p,hsa-miR-4533,hsa-miR-6838-5p,hsa-miR-552-3p,hsa-miR-3173-3p,hsa-miR-125a-3p,hsa-miR-15b-5p,hsa-miR-9500,hsa-miR-4710,hsa-miR-370-3p,hsa-miR-6891-5p,hsa-miR-204-3p,hsa-miR-4689,hsa-miR-424-5p,hsa-miR-7114-5p,hsa-miR-4779,hsa-miR-4651,hsa-miR-3692-5p,hsa-miR-3921,hs…
hsa_circ_IPCE1	hsa_circ_IPCE1	circRNA	NM_006698	BLCAP	protein_coding	1.38039e-09	1.47886e-06	63	38	134	0.283582	267	0.142322	2588	hsa-miR-3619-5p,hsa-miR-4314,hsa-miR-4690-5p,hsa-miR-548g-3p,hsa-miR-608,hsa-miR-6858-5p,hsa-miR-4646-5p,hsa-miR-4298,hsa-miR-16-5p,hsa-miR-195-5p,hsa-miR-15a-5p,hsa-miR-4533,hsa-miR-130b-5p,hsa-miR-6838-5p,hsa-miR-6876-5p,hsa-miR-432-3p,hsa-miR-3134,hsa-miR-3173-3p,hsa-miR-4742-5p,hsa-miR-548e-5p,hsa-miR-125a-3p,hsa-miR-15b-5p,hsa-miR-370-3p,hsa-miR-6891-5p,hsa-miR-5787,hsa-miR-204-3p,hsa-miR-36…
hsa_circ_IPCE1	hsa_circ_IPCE1	circRNA	NM_014550	CARD10	protein_coding	1.35901e-05	0.000560323	1636	23	134	0.171642	172	0.133721	2588	hsa-miR-608,hsa-miR-6858-5p,hsa-miR-6842-5p,hsa-miR-16-5p,hsa-miR-195-5p,hsa-miR-15a-5p,hsa-miR-4685-5p,hsa-miR-6838-5p,hsa-miR-6876-5p,hsa-miR-552-3p,hsa-miR-3173-3p,hsa-miR-125a-3p,hsa-miR-7113-5p,hsa-miR-889-5p,hsa-miR-497-5p,hsa-miR-4689,hsa-miR-424-5p,hsa-miR-3918,hsa-miR-6837-5p,hsa-miR-4476,hsa-miR-4651,hsa-miR-6752-5p,hsa-miR-7110-5p
hsa_circ_IPCE1	hsa_circ_IPCE1	circRNA	NM_001156474	CCDC81	protein_coding	3.40539e-10	5.55826e-07	41	20	134	0.149254	75	0.266667	2588	hsa-miR-3619-5p,hsa-miR-6837-3p,hsa-miR-608,hsa-miR-6842-5p,hsa-miR-195-5p,hsa-miR-15a-5p,hsa-miR-6838-5p,hsa-miR-4505,hsa-miR-766-5p,hsa-miR-15b-5p,hsa-miR-5787,hsa-miR-497-5p,hsa-miR-761,hsa-miR-424-5p,hsa-miR-214-3p,hsa-miR-4651,hsa-miR-6752-5p,hsa-miR-3921,hsa-miR-7110-5p,hsa-miR-4653-5p
hsa_circ_IPCE1	hsa_circ_IPCE1	circRNA	NM_022039	FBXW4	protein_coding	1.49969e-05	0.000599645	1688	23	134	0.171642	173	0.132948	2588	hsa-miR-3619-5p,hsa-miR-4314,hsa-miR-5589-5p,hsa-miR-6858-5p,hsa-miR-4646-5p,hsa-miR-16-5p,hsa-miR-15a-5p,hsa-miR-130b-5p,hsa-miR-216a-3p,hsa-miR-6838-5p,hsa-miR-6876-5p,hsa-miR-4742-5p,hsa-miR-128-3p,hsa-miR-15b-5p,hsa-miR-4710,hsa-miR-204-3p,hsa-miR-497-5p,hsa-miR-424-5p,hsa-miR-1298-3p,hsa-miR-214-3p,hsa-miR-4476,hsa-miR-3681-3p,hsa-miR-6747-3p
hsa_circ_IPCE1	hsa_circ_IPCE1	circRNA	NM_016817	OAS2	protein_coding	2.84905e-07	4.56981e-05	420	30	134	0.223881	219	0.136986	2588	hsa-miR-3619-5p,hsa-miR-3691-5p,hsa-miR-6776-5p,hsa-miR-3681-5p,hsa-miR-608,hsa-miR-6842-5p,hsa-miR-16-5p,hsa-miR-4533,hsa-miR-4701-3p,hsa-miR-4646-3p,hsa-miR-145-3p,hsa-miR-1262,hsa-miR-130b-5p,hsa-miR-3120-3p,hsa-miR-3173-3p,hsa-miR-6736-5p,hsa-miR-766-5p,hsa-miR-9500,hsa-miR-6891-5p,hsa-miR-3605-5p,hsa-miR-761,hsa-miR-4291,hsa-miR-1252-5p,hsa-miR-7114-5p,hsa-miR-214-3p,hsa-miR-4651,hsa-miR-369…
hsa_circ_IPCE1	hsa_circ_IPCE1	circRNA	ENST00000429220	ZNF259	protein_coding	5.25551e-07	6.73084e-05	527	30	134	0.223881	225	0.133333	2588	hsa-miR-6837-3p,hsa-miR-4646-5p,hsa-miR-141-5p,hsa-miR-16-5p,hsa-miR-195-5p,hsa-miR-15a-5p,hsa-miR-4533,hsa-miR-4685-5p,hsa-miR-6838-5p,hsa-miR-15b-5p,hsa-miR-4710,hsa-miR-6891-5p,hsa-miR-6787-3p,hsa-miR-5787,hsa-miR-204-3p,hsa-miR-497-5p,hsa-miR-922,hsa-miR-1266-3p,hsa-miR-452-5p,hsa-miR-424-5p,hsa-miR-1252-5p,hsa-miR-3918,hsa-miR-5706,hsa-miR-6837-5p,hsa-miR-6809-5p,hsa-miR-7152-5p,hsa-miR-3692…
hsa_circ_IPCE1	hsa_circ_IPCE1	circRNA	NM_002181	IHH	protein_coding	5.55691e-10	7.65424e-07	49	31	134	0.231343	180	0.172222	2588	hsa-miR-4690-5p,hsa-miR-4647,hsa-miR-608,hsa-miR-6858-5p,hsa-miR-6842-5p,hsa-miR-4662b,hsa-miR-16-5p,hsa-miR-195-5p,hsa-miR-15a-5p,hsa-miR-4685-5p,hsa-miR-6838-5p,hsa-miR-432-3p,hsa-miR-3134,hsa-miR-766-5p,hsa-miR-15b-5p,hsa-miR-7113-5p,hsa-miR-6787-3p,hsa-miR-497-5p,hsa-miR-4291,hsa-miR-4689,hsa-miR-922,hsa-miR-4426,hsa-miR-424-5p,hsa-miR-3918,hsa-miR-5706,hsa-miR-4711-3p,hsa-miR-6837-5p,hsa-miR…
hsa_circ_IPCE1	hsa_circ_IPCE1	circRNA	NM_002878	RAD51D	protein_coding	7.83866e-08	1.87611e-05	281	31	134	0.231343	219	0.141553	2588	hsa-miR-3619-5p,hsa-miR-4690-5p,hsa-miR-6818-3p,hsa-miR-4646-5p,hsa-miR-16-5p,hsa-miR-195-5p,hsa-miR-15a-5p,hsa-miR-28-3p,hsa-miR-4533,hsa-miR-130b-5p,hsa-miR-216a-3p,hsa-miR-6838-5p,hsa-miR-3173-3p,hsa-miR-766-5p,hsa-miR-128-3p,hsa-miR-15b-5p,hsa-miR-9500,hsa-miR-6891-5p,hsa-miR-5787,hsa-miR-204-3p,hsa-miR-497-5p,hsa-miR-761,hsa-miR-424-5p,hsa-miR-1252-5p,hsa-miR-6077,hsa-miR-7114-5p,hsa-miR-607…
hsa_circ_IPCE1	hsa_circ_IPCE1	circRNA	NM_004408	DNM1	protein_coding	7.45685e-05	0.00182485	2755	18	134	0.134328	129	0.139535	2588	hsa-miR-3619-5p,hsa-miR-6894-3p,hsa-miR-608,hsa-miR-6842-5p,hsa-miR-216a-3p,hsa-miR-4505,hsa-miR-3173-3p,hsa-miR-128-3p,hsa-miR-6732-5p,hsa-miR-6891-5p,hsa-miR-5787,hsa-miR-761,hsa-miR-214-3p,hsa-miR-6809-5p,hsa-miR-3681-3p,hsa-miR-4651,hsa-miR-6752-5p,hsa-miR-7110-5p
hsa_circ_IPCE1	hsa_circ_IPCE1	circRNA	NM_001001660	LYRM5	protein_coding	1.75599e-11	6.58438e-08	18	21	134	0.156716	72	0.291667	2588	hsa-miR-3619-5p,hsa-miR-4690-5p,hsa-miR-141-5p,hsa-miR-16-5p,hsa-miR-195-5p,hsa-miR-15a-5p,hsa-miR-4701-3p,hsa-miR-145-3p,hsa-miR-1262,hsa-miR-6838-5p,hsa-miR-552-3p,hsa-miR-6736-5p,hsa-miR-125a-3p,hsa-miR-15b-5p,hsa-miR-497-5p,hsa-miR-761,hsa-miR-452-5p,hsa-miR-424-5p,hsa-miR-214-3p,hsa-miR-4530,hsa-miR-892c-3p
hsa_circ_IPCE1	hsa_circ_IPCE1	circRNA	ENST00000345988	PPL	protein_coding	3.3529e-06	0.000219071	1032	21	134	0.156716	136	0.154412	2588	hsa-miR-6858-5p,hsa-miR-16-5p,hsa-miR-195-5p,hsa-miR-15a-5p,hsa-miR-4685-5p,hsa-miR-3173-3p,hsa-miR-766-5p,hsa-miR-15b-5p,hsa-miR-6891-5p,hsa-miR-510-5p,hsa-miR-3605-5p,hsa-miR-497-5p,hsa-miR-4689,hsa-miR-452-5p,hsa-miR-424-5p,hsa-miR-6837-5p,hsa-miR-6809-5p,hsa-miR-1257,hsa-miR-892c-3p,hsa-miR-3921,hsa-miR-4653-5p
hsa_circ_IPCE1	hsa_circ_IPCE1	circRNA	NM_005582	CD180	protein_coding	2.264e-05	0.000792154	1929	21	134	0.156716	153	0.137255	2588	hsa-miR-4314,hsa-miR-608,hsa-miR-6842-5p,hsa-miR-16-5p,hsa-miR-3692-3p,hsa-miR-195-5p,hsa-miR-15a-5p,hsa-miR-4646-3p,hsa-miR-216a-3p,hsa-miR-6838-5p,hsa-miR-128-3p,hsa-miR-15b-5p,hsa-miR-497-5p,hsa-miR-922,hsa-miR-424-5p,hsa-miR-4530,hsa-miR-3681-3p,hsa-miR-4651,hsa-miR-6857-3p,hsa-miR-6752-5p,hsa-miR-7110-5p
hsa_circ_IPCE1	hsa_circ_IPCE1	circRNA	NM_030912	TRIM8	protein_coding	6.00442e-07	7.27304e-05	555	27	134	0.201493	190	0.142105	2588	hsa-miR-4314,hsa-miR-4647,hsa-miR-6858-5p,hsa-miR-4646-5p,hsa-miR-4533,hsa-miR-4685-5p,hsa-miR-6876-5p,hsa-miR-4505,hsa-miR-4742-5p,hsa-miR-4710,hsa-miR-370-3p,hsa-miR-5787,hsa-miR-204-3p,hsa-miR-4689,hsa-miR-592,hsa-miR-6077,hsa-miR-3918,hsa-miR-5706,hsa-miR-6837-5p,hsa-miR-4476,hsa-miR-6809-5p,hsa-miR-6752-5p,hsa-miR-3921,hsa-miR-4782-5p,hsa-miR-6893-3p,hsa-miR-7110-5p,hsa-miR-4653-5p
hsa_circ_IPCE1	hsa_circ_IPCE1	circRNA	NM_175062	RASGEF1C	protein_coding	2.61554e-06	0.000186145	943	21	134	0.156716	134	0.156716	2588	hsa-miR-6894-3p,hsa-miR-6776-5p,hsa-miR-3692-3p,hsa-miR-195-5p,hsa-miR-15a-5p,hsa-miR-4685-5p,hsa-miR-6838-5p,hsa-miR-4505,hsa-miR-15b-5p,hsa-miR-4710,hsa-miR-6732-5p,hsa-miR-370-3p,hsa-miR-5787,hsa-miR-3605-5p,hsa-miR-497-5p,hsa-miR-424-5p,hsa-miR-3918,hsa-miR-6837-5p,hsa-miR-4530,hsa-miR-4476,hsa-miR-6893-3p
hsa_circ_IPCE1	hsa_circ_IPCE1	circRNA	NM_020933	ZNF317	protein_coding	1.00207e-08	5.04729e-06	134	37	134	0.276119	273	0.135531	2588	hsa-miR-3619-5p,hsa-miR-6837-3p,hsa-miR-4647,hsa-miR-6818-3p,hsa-miR-3681-5p,hsa-miR-6858-5p,hsa-miR-494-5p,hsa-miR-4662b,hsa-miR-141-5p,hsa-miR-16-5p,hsa-miR-3692-3p,hsa-miR-195-5p,hsa-miR-15a-5p,hsa-miR-4685-5p,hsa-miR-6838-5p,hsa-miR-432-3p,hsa-miR-3166,hsa-miR-8056,hsa-miR-3173-3p,hsa-miR-766-5p,hsa-miR-15b-5p,hsa-miR-6891-5p,hsa-miR-323b-5p,hsa-miR-410-5p,hsa-miR-497-5p,hsa-miR-761,hsa-miR-4…
hsa_circ_IPCE1	hsa_circ_IPCE1	circRNA	NM_172194	OR4Q3	protein_coding	0.000122612	0.00256767	3220	19	134	0.141791	146	0.130137	2588	hsa-miR-3619-5p,hsa-miR-4690-5p,hsa-miR-3681-5p,hsa-miR-545-3p,hsa-miR-4298,hsa-miR-3166,hsa-miR-4742-5p,hsa-miR-125a-3p,hsa-miR-766-5p,hsa-miR-6732-5p,hsa-miR-370-3p,hsa-miR-6787-3p,hsa-miR-761,hsa-miR-922,hsa-miR-1298-3p,hsa-miR-214-3p,hsa-miR-4530,hsa-miR-1302,hsa-miR-6849-5p
hsa_circ_IPCE1	hsa_circ_IPCE1	circRNA	NM_001005235	OR1L4	protein_coding	8.15315e-06	0.000398471	1380	24	134	0.179104	179	0.134078	2588	hsa-miR-3619-5p,hsa-miR-5589-5p,hsa-miR-4647,hsa-miR-6776-5p,hsa-miR-6818-3p,hsa-miR-4662b,hsa-miR-216a-3p,hsa-miR-6876-5p,hsa-miR-4505,hsa-miR-128-3p,hsa-miR-6732-5p,hsa-miR-5787,hsa-miR-3605-5p,hsa-miR-761,hsa-miR-592,hsa-miR-4426,hsa-miR-6077,hsa-miR-214-3p,hsa-miR-5706,hsa-miR-4436b-5p,hsa-miR-4530,hsa-miR-4476,hsa-miR-892a,hsa-miR-4782-5p
hsa_circ_IPCE1	hsa_circ_IPCE1	circRNA	NM_001037814	GAB4	protein_coding	3.57239e-06	0.000228762	1053	24	134	0.179104	171	0.140351	2588	hsa-miR-4690-5p,hsa-miR-545-3p,hsa-miR-6842-5p,hsa-miR-195-5p,hsa-miR-15a-5p,hsa-miR-4685-5p,hsa-miR-6838-5p,hsa-miR-4742-5p,hsa-miR-15b-5p,hsa-miR-6732-5p,hsa-miR-370-3p,hsa-miR-3605-5p,hsa-miR-497-5p,hsa-miR-424-5p,hsa-miR-6077,hsa-miR-4499,hsa-miR-6837-5p,hsa-miR-3692-5p,hsa-miR-6857-3p,hsa-miR-6752-5p,hsa-miR-3921,hsa-miR-6893-3p,hsa-miR-7110-5p,hsa-miR-4653-5p
hsa_circ_IPCE1	hsa_circ_IPCE1	circRNA	ENST00000593290	LINC01101	protein_coding	1.06965e-07	2.32888e-05	310	32	134	0.238806	234	0.136752	2588	hsa-miR-4690-5p,hsa-miR-4646-5p,hsa-miR-16-5p,hsa-miR-195-5p,hsa-miR-15a-5p,hsa-miR-4533,hsa-miR-501-5p,hsa-miR-4685-5p,hsa-miR-216a-3p,hsa-miR-6838-5p,hsa-miR-6876-5p,hsa-miR-432-3p,hsa-miR-3134,hsa-miR-4505,hsa-miR-4742-5p,hsa-miR-766-5p,hsa-miR-128-3p,hsa-miR-15b-5p,hsa-miR-9500,hsa-miR-7113-5p,hsa-miR-5787,hsa-miR-204-3p,hsa-miR-3605-5p,hsa-miR-497-5p,hsa-miR-3074-5p,hsa-miR-424-5p,hsa-miR-39…
hsa_circ_IPCE1	hsa_circ_IPCE1	circRNA	NM_006659	TUBGCP2	protein_coding	5.43649e-06	0.000305266	1202	24	134	0.179104	175	0.137143	2588	hsa-miR-3619-5p,hsa-miR-3692-3p,hsa-miR-501-5p,hsa-miR-4685-5p,hsa-miR-6876-5p,hsa-miR-3166,hsa-miR-3173-3p,hsa-miR-548e-5p,hsa-miR-766-5p,hsa-miR-370-3p,hsa-miR-6891-5p,hsa-miR-7113-5p,hsa-miR-761,hsa-miR-3074-5p,hsa-miR-4291,hsa-miR-1266-3p,hsa-miR-3918,hsa-miR-214-3p,hsa-miR-4436b-5p,hsa-miR-4779,hsa-miR-548av-3p,hsa-miR-6837-5p,hsa-miR-4504,hsa-miR-6893-3p
hsa_circ_IPCE1	hsa_circ_IPCE1	circRNA	NM_014278	HSPA4L	protein_coding	7.21062e-06	0.00036763	1320	22	134	0.164179	154	0.142857	2588	hsa-miR-3619-5p,hsa-miR-4647,hsa-miR-1323,hsa-miR-545-3p,hsa-miR-4662b,hsa-miR-16-5p,hsa-miR-195-5p,hsa-miR-15a-5p,hsa-miR-4782-3p,hsa-miR-501-5p,hsa-miR-6838-5p,hsa-miR-15b-5p,hsa-miR-497-5p,hsa-miR-761,hsa-miR-4426,hsa-miR-6766-3p,hsa-miR-424-5p,hsa-miR-214-3p,hsa-miR-548av-3p,hsa-miR-3692-5p,hsa-miR-3921,hsa-miR-4653-5p
hsa_circ_IPCE1	hsa_circ_IPCE1	circRNA	NM_001564	ING2	protein_coding	7.80023e-07	8.71637e-05	604	25	134	0.186567	169	0.147929	2588	hsa-miR-3619-5p,hsa-miR-3681-5p,hsa-miR-4298,hsa-miR-16-5p,hsa-miR-3692-3p,hsa-miR-195-5p,hsa-miR-15a-5p,hsa-miR-6838-5p,hsa-miR-6876-5p,hsa-miR-552-3p,hsa-miR-4742-3p,hsa-miR-125a-3p,hsa-miR-15b-5p,hsa-miR-497-5p,hsa-miR-761,hsa-miR-1266-3p,hsa-miR-5089-3p,hsa-miR-424-5p,hsa-miR-214-3p,hsa-miR-4476,hsa-miR-1257,hsa-miR-7152-5p,hsa-miR-1302,hsa-miR-6849-5p,hsa-miR-4645-3p
hsa_circ_IPCE1	hsa_circ_IPCE1	circRNA	NM_018384	GIMAP5	protein_coding	6.02982e-05	0.00158049	2573	18	134	0.134328	127	0.141732	2588	hsa-miR-3619-5p,hsa-miR-4690-5p,hsa-miR-608,hsa-miR-141-5p,hsa-miR-16-5p,hsa-miR-195-5p,hsa-miR-15a-5p,hsa-miR-6838-5p,hsa-miR-3166,hsa-miR-3120-3p,hsa-miR-766-5p,hsa-miR-15b-5p,hsa-miR-7113-5p,hsa-miR-497-5p,hsa-miR-424-5p,hsa-miR-214-3p,hsa-miR-3921,hsa-miR-4653-5p
hsa_circ_IPCE1	hsa_circ_IPCE1	circRNA	NM_031859	PCDHA10	protein_coding	9.24192e-07	9.73126e-05	641	27	134	0.201493	194	0.139175	2588	hsa-miR-6837-3p,hsa-miR-494-5p,hsa-miR-141-5p,hsa-miR-16-5p,hsa-miR-195-5p,hsa-miR-15a-5p,hsa-miR-6838-5p,hsa-miR-3166,hsa-miR-4505,hsa-miR-125a-3p,hsa-miR-15b-5p,hsa-miR-323b-5p,hsa-miR-410-5p,hsa-miR-5787,hsa-miR-497-5p,hsa-miR-761,hsa-miR-4291,hsa-miR-5586-5p,hsa-miR-922,hsa-miR-424-5p,hsa-miR-4762-3p,hsa-miR-3918,hsa-miR-4499,hsa-miR-5706,hsa-miR-4711-3p,hsa-miR-4530,hsa-miR-6857-3p
hsa_circ_IPCE1	hsa_circ_IPCE1	circRNA	NM_007373	SHOC2	protein_coding	1.72112e-06	0.00014249	812	27	134	0.201493	200	0.135	2588	hsa-miR-1323,hsa-miR-3691-5p,hsa-miR-3681-5p,hsa-miR-4752,hsa-miR-545-3p,hsa-miR-16-5p,hsa-miR-195-5p,hsa-miR-15a-5p,hsa-miR-6838-5p,hsa-miR-4742-3p,hsa-miR-548e-5p,hsa-miR-128-3p,hsa-miR-15b-5p,hsa-miR-1468-3p,hsa-miR-497-5p,hsa-miR-4676-3p,hsa-miR-4291,hsa-miR-4512,hsa-miR-922,hsa-miR-452-5p,hsa-miR-424-5p,hsa-miR-3918,hsa-miR-892c-3p,hsa-miR-6849-5p,hsa-miR-3921,hsa-miR-6747-3p,hsa-miR-4653-5p
hsa_circ_IPCE1	hsa_circ_IPCE1	circRNA	NM_032594	INSM2	protein_coding	6.66955e-06	0.000347879	1294	24	134	0.179104	177	0.135593	2588	hsa-miR-3681-5p,hsa-miR-545-3p,hsa-miR-6842-5p,hsa-miR-141-5p,hsa-miR-16-5p,hsa-miR-195-5p,hsa-miR-15a-5p,hsa-miR-4668-3p,hsa-miR-4533,hsa-miR-1262,hsa-miR-6838-5p,hsa-miR-6876-5p,hsa-miR-8056,hsa-miR-4742-3p,hsa-miR-6736-5p,hsa-miR-15b-5p,hsa-miR-6732-5p,hsa-miR-497-5p,hsa-miR-922,hsa-miR-424-5p,hsa-miR-4476,hsa-miR-6752-5p,hsa-miR-6849-5p,hsa-miR-7110-5p
hsa_circ_IPCE1	hsa_circ_IPCE1	circRNA	NM_001001827	OR2T35	protein_coding	3.50217e-13	3.93959e-09	6	38	134	0.283582	206	0.184466	2588	hsa-miR-3619-5p,hsa-miR-4314,hsa-miR-4690-5p,hsa-miR-4647,hsa-miR-3691-5p,hsa-miR-4752,hsa-miR-6858-5p,hsa-miR-6842-5p,hsa-miR-4662b,hsa-miR-195-5p,hsa-miR-15a-5p,hsa-miR-4533,hsa-miR-4701-3p,hsa-miR-1262,hsa-miR-6838-5p,hsa-miR-6876-5p,hsa-miR-3166,hsa-miR-4505,hsa-miR-6736-5p,hsa-miR-766-5p,hsa-miR-15b-5p,hsa-miR-4710,hsa-miR-5787,hsa-miR-3605-5p,hsa-miR-497-5p,hsa-miR-761,hsa-miR-4689,hsa-miR-…
hsa_circ_IPCE1	hsa_circ_IPCE1	circRNA	NM_033028	BBS4	protein_coding	2.46618e-05	0.000848813	1957	20	134	0.149254	142	0.140845	2588	hsa-miR-3619-5p,hsa-miR-4690-5p,hsa-miR-4533,hsa-miR-6891-3p,hsa-miR-4685-5p,hsa-miR-6876-5p,hsa-miR-3166,hsa-miR-4742-3p,hsa-miR-640,hsa-miR-6787-3p,hsa-miR-761,hsa-miR-4291,hsa-miR-5586-5p,hsa-miR-922,hsa-miR-214-3p,hsa-miR-5706,hsa-miR-4476,hsa-miR-892a,hsa-miR-3692-5p,hsa-miR-4753-3p
hsa_circ_IPCE1	hsa_circ_IPCE1	circRNA	NM_016034	MRPS2	protein_coding	9.19917e-05	0.00211379	2934	19	134	0.141791	143	0.132867	2588	hsa-miR-3691-5p,hsa-miR-16-5p,hsa-miR-195-5p,hsa-miR-15a-5p,hsa-miR-4685-5p,hsa-miR-6838-5p,hsa-miR-4505,hsa-miR-15b-5p,hsa-miR-5787,hsa-miR-3605-5p,hsa-miR-497-5p,hsa-miR-424-5p,hsa-miR-548av-3p,hsa-miR-6837-5p,hsa-miR-4530,hsa-miR-3692-5p,hsa-miR-6857-3p,hsa-miR-3921,hsa-miR-4653-5p
hsa_circ_IPCE1	hsa_circ_IPCE1	circRNA	ENST00000332558	AC009365.3	protein_coding	5.37902e-07	6.79872e-05	534	27	134	0.201493	189	0.142857	2588	hsa-miR-6894-3p,hsa-miR-6776-5p,hsa-miR-6818-3p,hsa-miR-545-3p,hsa-miR-4646-5p,hsa-miR-16-5p,hsa-miR-195-5p,hsa-miR-15a-5p,hsa-miR-4668-3p,hsa-miR-1262,hsa-miR-4685-5p,hsa-miR-6838-5p,hsa-miR-6876-5p,hsa-miR-3134,hsa-miR-766-5p,hsa-miR-15b-5p,hsa-miR-204-3p,hsa-miR-497-5p,hsa-miR-922,hsa-miR-592,hsa-miR-1266-3p,hsa-miR-6837-5p,hsa-miR-4476,hsa-miR-6809-5p,hsa-miR-4504,hsa-miR-3692-5p,hsa-miR-6747…
hsa_circ_IPCE1	hsa_circ_IPCE1	circRNA	NM_052972	LRG1	protein_coding	3.88122e-05	0.00116478	2248	18	134	0.134328	123	0.146341	2588	hsa-miR-4314,hsa-miR-4647,hsa-miR-4646-5p,hsa-miR-4662b,hsa-miR-4533,hsa-miR-4685-5p,hsa-miR-6876-5p,hsa-miR-432-3p,hsa-miR-552-3p,hsa-miR-3134,hsa-miR-4505,hsa-miR-5787,hsa-miR-204-3p,hsa-miR-4426,hsa-miR-1298-3p,hsa-miR-6837-5p,hsa-miR-4476,hsa-miR-6747-3p
hsa_circ_IPCE1	hsa_circ_IPCE1	circRNA	NM_003806	HRK	protein_coding	2.62281e-06	0.000186145	950	26	134	0.19403	192	0.135417	2588	hsa-miR-3619-5p,hsa-miR-4690-5p,hsa-miR-608,hsa-miR-545-3p,hsa-miR-6842-5p,hsa-miR-16-5p,hsa-miR-195-5p,hsa-miR-15a-5p,hsa-miR-4646-3p,hsa-miR-6838-5p,hsa-miR-6876-5p,hsa-miR-3120-3p,hsa-miR-15b-5p,hsa-miR-1468-3p,hsa-miR-497-5p,hsa-miR-761,hsa-miR-214-3p,hsa-miR-5706,hsa-miR-4436b-5p,hsa-miR-4530,hsa-miR-4476,hsa-miR-4651,hsa-miR-6752-5p,hsa-miR-4782-5p,hsa-miR-6873-3p,hsa-miR-7110-5p
hsa_circ_IPCE1	hsa_circ_IPCE1	circRNA	NM_001001683	MED11	protein_coding	4.4234e-10	6.7853e-07	44	20	134	0.149254	76	0.263158	2588	hsa-miR-3619-5p,hsa-miR-6818-3p,hsa-miR-16-5p,hsa-miR-195-5p,hsa-miR-15a-5p,hsa-miR-6838-5p,hsa-miR-552-3p,hsa-miR-4505,hsa-miR-125a-3p,hsa-miR-15b-5p,hsa-miR-370-3p,hsa-miR-5787,hsa-miR-497-5p,hsa-miR-761,hsa-miR-424-5p,hsa-miR-4530,hsa-miR-3692-5p,hsa-miR-3921,hsa-miR-4653-5p,hsa-miR-6841-5p
hsa_circ_IPCE1	hsa_circ_IPCE1	circRNA	NM_001195518	MICU1	protein_coding	9.23048e-08	2.09545e-05	297	27	134	0.201493	174	0.155172	2588	hsa-miR-3619-5p,hsa-miR-4690-5p,hsa-miR-6894-3p,hsa-miR-3691-5p,hsa-miR-141-5p,hsa-miR-16-5p,hsa-miR-195-5p,hsa-miR-15a-5p,hsa-miR-6891-3p,hsa-miR-6838-5p,hsa-miR-432-3p,hsa-miR-766-5p,hsa-miR-15b-5p,hsa-miR-9500,hsa-miR-6732-5p,hsa-miR-7113-5p,hsa-miR-6787-3p,hsa-miR-497-5p,hsa-miR-761,hsa-miR-922,hsa-miR-424-5p,hsa-miR-6072,hsa-miR-214-3p,hsa-miR-4779,hsa-miR-4530,hsa-miR-3921,hsa-miR-4653-5p
hsa_circ_IPCE1	hsa_circ_IPCE1	circRNA	NM_000388	CASR	protein_coding	1.34099e-08	5.91719e-06	152	34	134	0.253731	239	0.142259	2588	hsa-miR-3619-5p,hsa-miR-4690-5p,hsa-miR-4647,hsa-miR-6776-5p,hsa-miR-6818-3p,hsa-miR-6895-3p,hsa-miR-608,hsa-miR-545-3p,hsa-miR-4662b,hsa-miR-16-5p,hsa-miR-195-5p,hsa-miR-15a-5p,hsa-miR-4701-3p,hsa-miR-1262,hsa-miR-6838-5p,hsa-miR-3166,hsa-miR-3120-3p,hsa-miR-6736-5p,hsa-miR-15b-5p,hsa-miR-6787-3p,hsa-miR-497-5p,hsa-miR-761,hsa-miR-4426,hsa-miR-424-5p,hsa-miR-6077,hsa-miR-214-3p,hsa-miR-5706,hsa-…
hsa_circ_IPCE1	hsa_circ_IPCE1	circRNA	NM_001008737	LOC401052	protein_coding	1.22975e-05	0.000520543	1589	22	134	0.164179	159	0.138365	2588	hsa-miR-3691-5p,hsa-miR-6818-3p,hsa-miR-3681-5p,hsa-miR-6895-3p,hsa-miR-545-3p,hsa-miR-494-5p,hsa-miR-145-3p,hsa-miR-3120-3p,hsa-miR-766-5p,hsa-miR-323b-5p,hsa-miR-889-5p,hsa-miR-510-5p,hsa-miR-410-5p,hsa-miR-3074-5p,hsa-miR-922,hsa-miR-6077,hsa-miR-548av-3p,hsa-miR-7152-5p,hsa-miR-6849-5p,hsa-miR-3921,hsa-miR-6873-3p,hsa-miR-4653-5p
hsa_circ_IPCE1	hsa_circ_IPCE1	circRNA	NM_012213	MLYCD	protein_coding	3.31991e-07	5.12755e-05	436	19	134	0.141791	99	0.191919	2588	hsa-miR-6776-5p,hsa-miR-4646-5p,hsa-miR-141-5p,hsa-miR-16-5p,hsa-miR-195-5p,hsa-miR-15a-5p,hsa-miR-4646-3p,hsa-miR-216a-3p,hsa-miR-6838-5p,hsa-miR-128-3p,hsa-miR-15b-5p,hsa-miR-9500,hsa-miR-4710,hsa-miR-204-3p,hsa-miR-497-5p,hsa-miR-6853-3p,hsa-miR-424-5p,hsa-miR-1298-3p,hsa-miR-3681-3p
hsa_circ_IPCE1	hsa_circ_IPCE1	circRNA	NM_024111	CHAC1	protein_coding	1.32695e-05	0.000552504	1621	24	134	0.179104	184	0.130435	2588	hsa-miR-3619-5p,hsa-miR-6776-5p,hsa-miR-4646-5p,hsa-miR-4298,hsa-miR-15a-5p,hsa-miR-6891-3p,hsa-miR-4685-5p,hsa-miR-432-3p,hsa-miR-3166,hsa-miR-4505,hsa-miR-370-3p,hsa-miR-889-5p,hsa-miR-5787,hsa-miR-204-3p,hsa-miR-497-5p,hsa-miR-761,hsa-miR-5586-5p,hsa-miR-4512,hsa-miR-3918,hsa-miR-6072,hsa-miR-214-3p,hsa-miR-6837-5p,hsa-miR-1302,hsa-miR-6893-3p
hsa_circ_IPCE1	hsa_circ_IPCE1	circRNA	NM_021873	CDC25B	protein_coding	8.28261e-07	9.11775e-05	613	28	134	0.208955	205	0.136585	2588	hsa-miR-3619-5p,hsa-miR-4690-5p,hsa-miR-608,hsa-miR-4298,hsa-miR-16-5p,hsa-miR-195-5p,hsa-miR-15a-5p,hsa-miR-4533,hsa-miR-6838-5p,hsa-miR-6876-5p,hsa-miR-3166,hsa-miR-4505,hsa-miR-15b-5p,hsa-miR-370-3p,hsa-miR-5787,hsa-miR-497-5p,hsa-miR-761,hsa-miR-3074-5p,hsa-miR-4291,hsa-miR-4512,hsa-miR-424-5p,hsa-miR-1298-3p,hsa-miR-3918,hsa-miR-214-3p,hsa-miR-4530,hsa-miR-4476,hsa-miR-4651,hsa-miR-6893-3p
hsa_circ_IPCE1	hsa_circ_IPCE1	circRNA	NM_001004450	OR1B1	protein_coding	1.11297e-05	0.000491614	1527	23	134	0.171642	170	0.135294	2588	hsa-miR-3619-5p,hsa-miR-4690-5p,hsa-miR-4752,hsa-miR-16-5p,hsa-miR-195-5p,hsa-miR-15a-5p,hsa-miR-4701-3p,hsa-miR-1262,hsa-miR-6838-5p,hsa-miR-6876-5p,hsa-miR-552-3p,hsa-miR-3120-3p,hsa-miR-6736-5p,hsa-miR-15b-5p,hsa-miR-4710,hsa-miR-6732-5p,hsa-miR-497-5p,hsa-miR-761,hsa-miR-424-5p,hsa-miR-7114-5p,hsa-miR-214-3p,hsa-miR-4530,hsa-miR-4476
hsa_circ_IPCE1	hsa_circ_IPCE1	circRNA	NM_001042492	NF1	protein_coding	3.45878e-10	5.55826e-07	42	44	134	0.328358	329	0.133739	2588	hsa-miR-4314,hsa-miR-6894-3p,hsa-miR-4752,hsa-miR-608,hsa-miR-6842-5p,hsa-miR-4646-5p,hsa-miR-16-5p,hsa-miR-15a-5p,hsa-miR-4533,hsa-miR-4685-5p,hsa-miR-216a-3p,hsa-miR-6838-5p,hsa-miR-552-3p,hsa-miR-3173-3p,hsa-miR-125a-3p,hsa-miR-766-5p,hsa-miR-128-3p,hsa-miR-15b-5p,hsa-miR-9500,hsa-miR-1468-3p,hsa-miR-4710,hsa-miR-370-3p,hsa-miR-6891-5p,hsa-miR-204-3p,hsa-miR-497-5p,hsa-miR-3074-5p,hsa-miR-4512…
hsa_circ_IPCE1	hsa_circ_IPCE1	circRNA	NM_001267	CHAD	protein_coding	2.77461e-05	0.000918438	2039	21	134	0.156716	155	0.135484	2588	hsa-miR-5589-5p,hsa-miR-4647,hsa-miR-6776-5p,hsa-miR-6895-3p,hsa-miR-608,hsa-miR-545-3p,hsa-miR-4662b,hsa-miR-4533,hsa-miR-6838-5p,hsa-miR-6876-5p,hsa-miR-4505,hsa-miR-3120-3p,hsa-miR-5787,hsa-miR-4291,hsa-miR-922,hsa-miR-4426,hsa-miR-4762-3p,hsa-miR-4476,hsa-miR-6809-5p,hsa-miR-4651,hsa-miR-3692-5p
hsa_circ_IPCE1	hsa_circ_IPCE1	circRNA	NM_000386	BLMH	protein_coding	1.03428e-05	0.000471673	1480	19	134	0.141791	123	0.154472	2588	hsa-miR-6818-3p,hsa-miR-6858-5p,hsa-miR-16-5p,hsa-miR-195-5p,hsa-miR-15a-5p,hsa-miR-4533,hsa-miR-6838-5p,hsa-miR-6876-5p,hsa-miR-15b-5p,hsa-miR-497-5p,hsa-miR-3074-5p,hsa-miR-4689,hsa-miR-424-5p,hsa-miR-4530,hsa-miR-4476,hsa-miR-892a,hsa-miR-7152-5p,hsa-miR-6857-3p,hsa-miR-6873-3p
hsa_circ_IPCE1	hsa_circ_IPCE1	circRNA	NM_004918	TCL1B	protein_coding	4.5286e-05	0.00129366	2359	19	134	0.141791	136	0.139706	2588	hsa-miR-3619-5p,hsa-miR-5589-5p,hsa-miR-6894-3p,hsa-miR-6776-5p,hsa-miR-6858-5p,hsa-miR-6842-5p,hsa-miR-4298,hsa-miR-4505,hsa-miR-3173-3p,hsa-miR-5787,hsa-miR-761,hsa-miR-4291,hsa-miR-4689,hsa-miR-922,hsa-miR-3918,hsa-miR-214-3p,hsa-miR-4530,hsa-miR-6752-5p,hsa-miR-7110-5p
hsa_circ_IPCE1	hsa_circ_IPCE1	circRNA	NM_023927	GRAMD3	protein_coding	7.37739e-06	0.000372628	1333	24	134	0.179104	178	0.134831	2588	hsa-miR-3619-5p,hsa-miR-5589-5p,hsa-miR-545-3p,hsa-miR-141-5p,hsa-miR-16-5p,hsa-miR-195-5p,hsa-miR-15a-5p,hsa-miR-501-5p,hsa-miR-4685-5p,hsa-miR-6838-5p,hsa-miR-552-3p,hsa-miR-4505,hsa-miR-3120-3p,hsa-miR-4742-5p,hsa-miR-4742-3p,hsa-miR-125a-3p,hsa-miR-15b-5p,hsa-miR-761,hsa-miR-424-5p,hsa-miR-214-3p,hsa-miR-5706,hsa-miR-4779,hsa-miR-6837-5p,hsa-miR-4530
hsa_circ_IPCE1	hsa_circ_IPCE1	circRNA	NM_001199577	GIMAP1-GIMAP5	protein_coding	6.02982e-05	0.00158049	2574	18	134	0.134328	127	0.141732	2588	hsa-miR-3619-5p,hsa-miR-4690-5p,hsa-miR-608,hsa-miR-141-5p,hsa-miR-16-5p,hsa-miR-195-5p,hsa-miR-15a-5p,hsa-miR-6838-5p,hsa-miR-3166,hsa-miR-3120-3p,hsa-miR-766-5p,hsa-miR-15b-5p,hsa-miR-7113-5p,hsa-miR-497-5p,hsa-miR-424-5p,hsa-miR-214-3p,hsa-miR-3921,hsa-miR-4653-5p
hsa_circ_IPCE1	hsa_circ_IPCE1	circRNA	NM_001001656	OR9A4	protein_coding	5.59042e-05	0.00149218	2527	20	134	0.149254	150	0.133333	2588	hsa-miR-6894-3p,hsa-miR-433-3p,hsa-miR-16-5p,hsa-miR-195-5p,hsa-miR-15a-5p,hsa-miR-4646-3p,hsa-miR-4685-5p,hsa-miR-6838-5p,hsa-miR-552-3p,hsa-miR-3166,hsa-miR-125a-3p,hsa-miR-15b-5p,hsa-miR-9500,hsa-miR-7113-5p,hsa-miR-3605-5p,hsa-miR-497-5p,hsa-miR-4512,hsa-miR-424-5p,hsa-miR-6837-5p,hsa-miR-892a
hsa_circ_IPCE1	hsa_circ_IPCE1	circRNA	NM_172000	TEDDM1	protein_coding	6.11117e-09	3.71592e-06	111	35	134	0.261194	244	0.143443	2588	hsa-miR-4314,hsa-miR-3691-5p,hsa-miR-608,hsa-miR-6858-5p,hsa-miR-6842-5p,hsa-miR-4646-5p,hsa-miR-16-5p,hsa-miR-3692-3p,hsa-miR-195-5p,hsa-miR-15a-5p,hsa-miR-4701-3p,hsa-miR-1262,hsa-miR-130b-5p,hsa-miR-6838-5p,hsa-miR-4505,hsa-miR-3173-3p,hsa-miR-6736-5p,hsa-miR-766-5p,hsa-miR-15b-5p,hsa-miR-640,hsa-miR-9500,hsa-miR-4710,hsa-miR-6891-5p,hsa-miR-5787,hsa-miR-204-3p,hsa-miR-4291,hsa-miR-4689,hsa-mi…
hsa_circ_IPCE1	hsa_circ_IPCE1	circRNA	NM_032340	UQCC2	protein_coding	2.06816e-06	0.000158985	878	24	134	0.179104	166	0.144578	2588	hsa-miR-4314,hsa-miR-6858-5p,hsa-miR-4646-5p,hsa-miR-16-5p,hsa-miR-195-5p,hsa-miR-15a-5p,hsa-miR-6891-3p,hsa-miR-4685-5p,hsa-miR-6838-5p,hsa-miR-15b-5p,hsa-miR-204-3p,hsa-miR-497-5p,hsa-miR-761,hsa-miR-4512,hsa-miR-4689,hsa-miR-922,hsa-miR-424-5p,hsa-miR-3918,hsa-miR-6072,hsa-miR-214-3p,hsa-miR-4436b-5p,hsa-miR-3681-3p,hsa-miR-3921,hsa-miR-4653-5p
hsa_circ_IPCE1	hsa_circ_IPCE1	circRNA	NM_001004067	NOMO3	protein_coding	2.02908e-11	6.84753e-08	20	22	134	0.164179	80	0.275	2588	hsa-miR-3619-5p,hsa-miR-3681-5p,hsa-miR-195-5p,hsa-miR-15a-5p,hsa-miR-216a-3p,hsa-miR-6838-5p,hsa-miR-128-3p,hsa-miR-15b-5p,hsa-miR-9500,hsa-miR-4710,hsa-miR-3605-5p,hsa-miR-497-5p,hsa-miR-761,hsa-miR-4291,hsa-miR-922,hsa-miR-424-5p,hsa-miR-214-3p,hsa-miR-4779,hsa-miR-4530,hsa-miR-4504,hsa-miR-6849-5p,hsa-miR-6841-5p
hsa_circ_IPCE1	hsa_circ_IPCE1	circRNA	NM_001005164	OR52E2	protein_coding	1.83968e-05	0.000684117	1813	21	134	0.156716	151	0.139073	2588	hsa-miR-3691-5p,hsa-miR-6776-5p,hsa-miR-3681-5p,hsa-miR-4752,hsa-miR-28-3p,hsa-miR-4533,hsa-miR-4701-3p,hsa-miR-6876-5p,hsa-miR-8056,hsa-miR-3173-3p,hsa-miR-6736-5p,hsa-miR-640,hsa-miR-4710,hsa-miR-6891-5p,hsa-miR-3605-5p,hsa-miR-3074-5p,hsa-miR-4779,hsa-miR-4476,hsa-miR-6809-5p,hsa-miR-6849-5p,hsa-miR-4653-5p
hsa_circ_IPCE1	hsa_circ_IPCE1	circRNA	NM_201521	KLC4	protein_coding	5.08353e-10	7.41731e-07	45	26	134	0.19403	129	0.20155	2588	hsa-miR-3619-5p,hsa-miR-4690-5p,hsa-miR-608,hsa-miR-6858-5p,hsa-miR-6842-5p,hsa-miR-16-5p,hsa-miR-195-5p,hsa-miR-15a-5p,hsa-miR-145-3p,hsa-miR-4685-5p,hsa-miR-6838-5p,hsa-miR-15b-5p,hsa-miR-497-5p,hsa-miR-761,hsa-miR-4689,hsa-miR-922,hsa-miR-424-5p,hsa-miR-214-3p,hsa-miR-4779,hsa-miR-6837-5p,hsa-miR-4530,hsa-miR-4651,hsa-miR-6752-5p,hsa-miR-3921,hsa-miR-7110-5p,hsa-miR-4653-5p
hsa_circ_IPCE1	hsa_circ_IPCE1	circRNA	NM_002670	PLS1	protein_coding	1.67338e-05	0.000644651	1752	22	134	0.164179	162	0.135802	2588	hsa-miR-3619-5p,hsa-miR-5589-5p,hsa-miR-4647,hsa-miR-6776-5p,hsa-miR-4662b,hsa-miR-16-5p,hsa-miR-195-5p,hsa-miR-15a-5p,hsa-miR-4701-3p,hsa-miR-1262,hsa-miR-6838-5p,hsa-miR-6736-5p,hsa-miR-766-5p,hsa-miR-15b-5p,hsa-miR-497-5p,hsa-miR-922,hsa-miR-4426,hsa-miR-4499,hsa-miR-5706,hsa-miR-4645-3p,hsa-miR-4782-5p,hsa-miR-6873-3p
hsa_circ_IPCE1	hsa_circ_IPCE1	circRNA	NM_019557	MTFR1L	protein_coding	8.56989e-09	4.70257e-06	123	26	134	0.19403	146	0.178082	2588	hsa-miR-4314,hsa-miR-4647,hsa-miR-6858-5p,hsa-miR-4646-5p,hsa-miR-4662b,hsa-miR-16-5p,hsa-miR-195-5p,hsa-miR-15a-5p,hsa-miR-130b-5p,hsa-miR-6838-5p,hsa-miR-6876-5p,hsa-miR-15b-5p,hsa-miR-4710,hsa-miR-204-3p,hsa-miR-497-5p,hsa-miR-5586-5p,hsa-miR-4689,hsa-miR-424-5p,hsa-miR-3918,hsa-miR-4779,hsa-miR-4711-3p,hsa-miR-4530,hsa-miR-4476,hsa-miR-6809-5p,hsa-miR-4753-3p,hsa-miR-6873-3p
hsa_circ_IPCE1	hsa_circ_IPCE1	circRNA	ENST00000376403	FAM182B	protein_coding	4.34191e-05	0.00126044	2324	18	134	0.134328	124	0.145161	2588	hsa-miR-4314,hsa-miR-5589-5p,hsa-miR-1323,hsa-miR-6894-3p,hsa-miR-3681-5p,hsa-miR-6858-5p,hsa-miR-6842-5p,hsa-miR-4646-5p,hsa-miR-8056,hsa-miR-204-3p,hsa-miR-4689,hsa-miR-4312,hsa-miR-4779,hsa-miR-3692-5p,hsa-miR-6752-5p,hsa-miR-6849-5p,hsa-miR-6893-3p,hsa-miR-7110-5p
hsa_circ_IPCE1	hsa_circ_IPCE1	circRNA	NM_001004476	OR10K2	protein_coding	2.2633e-07	3.89075e-05	391	26	134	0.19403	170	0.152941	2588	hsa-miR-3619-5p,hsa-miR-4314,hsa-miR-6858-5p,hsa-miR-4298,hsa-miR-4533,hsa-miR-6876-5p,hsa-miR-432-3p,hsa-miR-3173-3p,hsa-miR-125a-3p,hsa-miR-766-5p,hsa-miR-6891-5p,hsa-miR-7113-5p,hsa-miR-3605-5p,hsa-miR-761,hsa-miR-4689,hsa-miR-922,hsa-miR-1252-5p,hsa-miR-6077,hsa-miR-214-3p,hsa-miR-4530,hsa-miR-4476,hsa-miR-6809-5p,hsa-miR-4504,hsa-miR-1302,hsa-miR-6857-3p,hsa-miR-6849-5p
hsa_circ_IPCE1	hsa_circ_IPCE1	circRNA	NM_030904	OR2T1	protein_coding	4.30532e-07	5.95457e-05	488	27	134	0.201493	187	0.144385	2588	hsa-miR-3619-5p,hsa-miR-4647,hsa-miR-6858-5p,hsa-miR-545-3p,hsa-miR-141-5p,hsa-miR-16-5p,hsa-miR-195-5p,hsa-miR-15a-5p,hsa-miR-4685-5p,hsa-miR-6838-5p,hsa-miR-766-5p,hsa-miR-15b-5p,hsa-miR-640,hsa-miR-6732-5p,hsa-miR-3605-5p,hsa-miR-497-5p,hsa-miR-761,hsa-miR-3074-5p,hsa-miR-4291,hsa-miR-5586-5p,hsa-miR-4689,hsa-miR-424-5p,hsa-miR-214-3p,hsa-miR-6837-5p,hsa-miR-4530,hsa-miR-3692-5p,hsa-miR-6747-3p
hsa_circ_IPCE1	hsa_circ_IPCE1	circRNA	NM_001001821	OR2T34	protein_coding	2.10115e-15	4.72717e-11	3	40	134	0.298507	197	0.203046	2588	hsa-miR-3619-5p,hsa-miR-4690-5p,hsa-miR-4647,hsa-miR-3691-5p,hsa-miR-3681-5p,hsa-miR-4752,hsa-miR-6858-5p,hsa-miR-545-3p,hsa-miR-6842-5p,hsa-miR-4662b,hsa-miR-16-5p,hsa-miR-195-5p,hsa-miR-15a-5p,hsa-miR-6838-5p,hsa-miR-6876-5p,hsa-miR-3166,hsa-miR-766-5p,hsa-miR-15b-5p,hsa-miR-6732-5p,hsa-miR-6787-3p,hsa-miR-510-5p,hsa-miR-3605-5p,hsa-miR-497-5p,hsa-miR-761,hsa-miR-4291,hsa-miR-4689,hsa-miR-4426,…
hsa_circ_IPCE1	hsa_circ_IPCE1	circRNA	NM_001004734	OR14I1	protein_coding	5.38423e-06	0.000303166	1196	25	134	0.186567	187	0.13369	2588	hsa-miR-3619-5p,hsa-miR-608,hsa-miR-6858-5p,hsa-miR-545-3p,hsa-miR-6842-5p,hsa-miR-4685-5p,hsa-miR-216a-3p,hsa-miR-6876-5p,hsa-miR-3134,hsa-miR-128-3p,hsa-miR-6732-5p,hsa-miR-889-5p,hsa-miR-4291,hsa-miR-922,hsa-miR-3918,hsa-miR-214-3p,hsa-miR-6837-5p,hsa-miR-4476,hsa-miR-892a,hsa-miR-3681-3p,hsa-miR-4651,hsa-miR-6857-3p,hsa-miR-6752-5p,hsa-miR-4645-3p,hsa-miR-7110-5p
hsa_circ_IPCE1	hsa_circ_IPCE1	circRNA	NM_006711	RNPS1	protein_coding	9.46544e-07	9.87923e-05	645	22	134	0.164179	137	0.160584	2588	hsa-miR-5589-5p,hsa-miR-6894-3p,hsa-miR-6776-5p,hsa-miR-6842-5p,hsa-miR-16-5p,hsa-miR-195-5p,hsa-miR-15a-5p,hsa-miR-4701-3p,hsa-miR-1262,hsa-miR-6838-5p,hsa-miR-548e-5p,hsa-miR-6736-5p,hsa-miR-15b-5p,hsa-miR-6732-5p,hsa-miR-370-3p,hsa-miR-889-5p,hsa-miR-497-5p,hsa-miR-424-5p,hsa-miR-4504,hsa-miR-6752-5p,hsa-miR-6893-3p,hsa-miR-7110-5p
hsa_circ_IPCE1	hsa_circ_IPCE1	circRNA	NM_174977	SEC14L4	protein_coding	1.01537e-08	5.07639e-06	135	32	134	0.238806	213	0.150235	2588	hsa-miR-3619-5p,hsa-miR-4314,hsa-miR-6776-5p,hsa-miR-608,hsa-miR-4646-5p,hsa-miR-4298,hsa-miR-4662b,hsa-miR-16-5p,hsa-miR-195-5p,hsa-miR-15a-5p,hsa-miR-4701-3p,hsa-miR-1262,hsa-miR-6838-5p,hsa-miR-432-3p,hsa-miR-552-3p,hsa-miR-6736-5p,hsa-miR-125a-3p,hsa-miR-15b-5p,hsa-miR-6787-3p,hsa-miR-204-3p,hsa-miR-497-5p,hsa-miR-761,hsa-miR-3074-5p,hsa-miR-922,hsa-miR-1266-3p,hsa-miR-424-5p,hsa-miR-214-3p,h…
hsa_circ_IPCE1	hsa_circ_IPCE1	circRNA	NM_013938	OR10H3	protein_coding	5.23338e-06	0.000297826	1186	26	134	0.19403	199	0.130653	2588	hsa-miR-3619-5p,hsa-miR-4647,hsa-miR-1323,hsa-miR-6842-5p,hsa-miR-4662b,hsa-miR-4533,hsa-miR-4701-3p,hsa-miR-1262,hsa-miR-216a-3p,hsa-miR-6876-5p,hsa-miR-6736-5p,hsa-miR-128-3p,hsa-miR-6732-5p,hsa-miR-3605-5p,hsa-miR-761,hsa-miR-4291,hsa-miR-922,hsa-miR-4426,hsa-miR-1252-5p,hsa-miR-4499,hsa-miR-214-3p,hsa-miR-4476,hsa-miR-3692-5p,hsa-miR-6752-5p,hsa-miR-4645-3p,hsa-miR-7110-5p
hsa_circ_IPCE1	hsa_circ_IPCE1	circRNA	NM_178548	TFAP2E	protein_coding	0.000136938	0.00276061	3345	18	134	0.134328	135	0.133333	2588	hsa-miR-4314,hsa-miR-16-5p,hsa-miR-15a-5p,hsa-miR-130b-5p,hsa-miR-6838-5p,hsa-miR-6876-5p,hsa-miR-3120-3p,hsa-miR-15b-5p,hsa-miR-497-5p,hsa-miR-4512,hsa-miR-424-5p,hsa-miR-3918,hsa-miR-5706,hsa-miR-4476,hsa-miR-4753-3p,hsa-miR-4782-5p,hsa-miR-6873-3p,hsa-miR-6841-5p
hsa_circ_IPCE1	hsa_circ_IPCE1	circRNA	NM_003827	NAPA	protein_coding	4.61543e-08	1.28725e-05	242	25	134	0.186567	147	0.170068	2588	hsa-miR-3619-5p,hsa-miR-608,hsa-miR-6842-5p,hsa-miR-4298,hsa-miR-4533,hsa-miR-4685-5p,hsa-miR-4505,hsa-miR-3173-3p,hsa-miR-9500,hsa-miR-6732-5p,hsa-miR-6891-5p,hsa-miR-6787-3p,hsa-miR-5787,hsa-miR-761,hsa-miR-922,hsa-miR-3918,hsa-miR-4779,hsa-miR-6837-5p,hsa-miR-4530,hsa-miR-6809-5p,hsa-miR-4651,hsa-miR-6752-5p,hsa-miR-3921,hsa-miR-7110-5p,hsa-miR-4653-5p
hsa_circ_IPCE1	hsa_circ_IPCE1	circRNA	NM_178168	OR10A5	protein_coding	8.95528e-06	0.00042703	1415	22	134	0.164179	156	0.141026	2588	hsa-miR-6858-5p,hsa-miR-433-3p,hsa-miR-16-5p,hsa-miR-195-5p,hsa-miR-15a-5p,hsa-miR-4533,hsa-miR-6838-5p,hsa-miR-6876-5p,hsa-miR-3173-3p,hsa-miR-766-5p,hsa-miR-15b-5p,hsa-miR-9500,hsa-miR-4710,hsa-miR-370-3p,hsa-miR-6891-5p,hsa-miR-3605-5p,hsa-miR-497-5p,hsa-miR-4689,hsa-miR-424-5p,hsa-miR-6077,hsa-miR-4476,hsa-miR-6893-3p
hsa_circ_IPCE1	hsa_circ_IPCE1	circRNA	NM_001004487	OR13J1	protein_coding	2.21228e-08	8.29531e-06	180	28	134	0.208955	174	0.16092	2588	hsa-miR-3619-5p,hsa-miR-5589-5p,hsa-miR-4690-5p,hsa-miR-6858-5p,hsa-miR-16-5p,hsa-miR-195-5p,hsa-miR-15a-5p,hsa-miR-4668-3p,hsa-miR-4685-5p,hsa-miR-6838-5p,hsa-miR-432-3p,hsa-miR-4505,hsa-miR-3120-3p,hsa-miR-125a-3p,hsa-miR-15b-5p,hsa-miR-9500,hsa-miR-889-5p,hsa-miR-5787,hsa-miR-497-5p,hsa-miR-761,hsa-miR-4689,hsa-miR-424-5p,hsa-miR-6077,hsa-miR-6072,hsa-miR-214-3p,hsa-miR-4779,hsa-miR-6837-5p,hs…
hsa_circ_IPCE1	hsa_circ_IPCE1	circRNA	NM_145652	WFDC5	protein_coding	2.06306e-07	3.71317e-05	375	22	134	0.164179	126	0.174603	2588	hsa-miR-3619-5p,hsa-miR-4690-5p,hsa-miR-3691-5p,hsa-miR-608,hsa-miR-16-5p,hsa-miR-195-5p,hsa-miR-15a-5p,hsa-miR-130b-5p,hsa-miR-6838-5p,hsa-miR-6876-5p,hsa-miR-432-3p,hsa-miR-766-5p,hsa-miR-15b-5p,hsa-miR-9500,hsa-miR-497-5p,hsa-miR-761,hsa-miR-4291,hsa-miR-424-5p,hsa-miR-214-3p,hsa-miR-4476,hsa-miR-1257,hsa-miR-4651
hsa_circ_IPCE1	hsa_circ_IPCE1	circRNA	NM_006018	HCAR3	protein_coding	1.92151e-05	0.000707144	1833	18	134	0.134328	117	0.153846	2588	hsa-miR-4690-5p,hsa-miR-195-5p,hsa-miR-15a-5p,hsa-miR-145-3p,hsa-miR-6838-5p,hsa-miR-548e-5p,hsa-miR-125a-3p,hsa-miR-766-5p,hsa-miR-15b-5p,hsa-miR-6787-3p,hsa-miR-497-5p,hsa-miR-3074-5p,hsa-miR-4676-3p,hsa-miR-4291,hsa-miR-922,hsa-miR-452-5p,hsa-miR-424-5p,hsa-miR-892c-3p
hsa_circ_IPCE1	hsa_circ_IPCE1	circRNA	NM_152574	TTC39B	protein_coding	0.000101595	0.00225338	3041	18	134	0.134328	132	0.136364	2588	hsa-miR-3619-5p,hsa-miR-548g-3p,hsa-miR-6818-3p,hsa-miR-16-5p,hsa-miR-195-5p,hsa-miR-15a-5p,hsa-miR-501-5p,hsa-miR-216a-3p,hsa-miR-6838-5p,hsa-miR-4742-5p,hsa-miR-128-3p,hsa-miR-497-5p,hsa-miR-761,hsa-miR-4676-3p,hsa-miR-424-5p,hsa-miR-214-3p,hsa-miR-3681-3p,hsa-miR-892c-3p
hsa_circ_IPCE1	hsa_circ_IPCE1	circRNA	UC001WDV.4	TRA@	protein_coding	4.21921e-07	5.87158e-05	485	22	134	0.164179	131	0.167939	2588	hsa-miR-3619-5p,hsa-miR-608,hsa-miR-6842-5p,hsa-miR-16-5p,hsa-miR-195-5p,hsa-miR-15a-5p,hsa-miR-4533,hsa-miR-6838-5p,hsa-miR-6876-5p,hsa-miR-15b-5p,hsa-miR-6732-5p,hsa-miR-761,hsa-miR-4512,hsa-miR-424-5p,hsa-miR-3918,hsa-miR-214-3p,hsa-miR-4779,hsa-miR-4476,hsa-miR-4504,hsa-miR-4651,hsa-miR-6752-5p,hsa-miR-7110-5p
hsa_circ_IPCE1	hsa_circ_IPCE1	circRNA	NM_138420	AHNAK2	protein_coding	1.73731e-06	0.00014249	821	23	134	0.171642	153	0.150327	2588	hsa-miR-3619-5p,hsa-miR-3691-5p,hsa-miR-4646-5p,hsa-miR-16-5p,hsa-miR-195-5p,hsa-miR-15a-5p,hsa-miR-216a-3p,hsa-miR-6838-5p,hsa-miR-128-3p,hsa-miR-15b-5p,hsa-miR-204-3p,hsa-miR-497-5p,hsa-miR-761,hsa-miR-424-5p,hsa-miR-214-3p,hsa-miR-4711-3p,hsa-miR-4530,hsa-miR-6809-5p,hsa-miR-3681-3p,hsa-miR-4504,hsa-miR-3692-5p,hsa-miR-3921,hsa-miR-4653-5p
hsa_circ_IPCE1	hsa_circ_IPCE1	circRNA	NM_006591	POLD3	protein_coding	5.38146e-10	7.56701e-07	48	40	134	0.298507	283	0.141343	2588	hsa-miR-4647,hsa-miR-1323,hsa-miR-6858-5p,hsa-miR-545-3p,hsa-miR-4662b,hsa-miR-141-5p,hsa-miR-16-5p,hsa-miR-195-5p,hsa-miR-15a-5p,hsa-miR-4685-5p,hsa-miR-6838-5p,hsa-miR-6876-5p,hsa-miR-552-3p,hsa-miR-3166,hsa-miR-125a-3p,hsa-miR-766-5p,hsa-miR-128-3p,hsa-miR-15b-5p,hsa-miR-9500,hsa-miR-4710,hsa-miR-6787-3p,hsa-miR-497-5p,hsa-miR-4676-3p,hsa-miR-5586-5p,hsa-miR-4689,hsa-miR-922,hsa-miR-4426,hsa-m…
hsa_circ_IPCE1	hsa_circ_IPCE1	circRNA	NM_001005500	OR4M1	protein_coding	7.36587e-07	8.34882e-05	595	23	134	0.171642	146	0.157534	2588	hsa-miR-4314,hsa-miR-433-3p,hsa-miR-4646-5p,hsa-miR-141-5p,hsa-miR-16-5p,hsa-miR-195-5p,hsa-miR-15a-5p,hsa-miR-6838-5p,hsa-miR-6876-5p,hsa-miR-432-3p,hsa-miR-3134,hsa-miR-3173-3p,hsa-miR-4742-5p,hsa-miR-15b-5p,hsa-miR-9500,hsa-miR-6891-5p,hsa-miR-889-5p,hsa-miR-204-3p,hsa-miR-497-5p,hsa-miR-922,hsa-miR-6077,hsa-miR-4779,hsa-miR-4476
hsa_circ_IPCE1	hsa_circ_IPCE1	circRNA	NM_002135	NR4A1	protein_coding	4.962e-11	1.33962e-07	25	26	134	0.19403	117	0.222222	2588	hsa-miR-3619-5p,hsa-miR-608,hsa-miR-6842-5p,hsa-miR-16-5p,hsa-miR-195-5p,hsa-miR-15a-5p,hsa-miR-4533,hsa-miR-130b-5p,hsa-miR-6838-5p,hsa-miR-4505,hsa-miR-3173-3p,hsa-miR-4742-3p,hsa-miR-125a-3p,hsa-miR-15b-5p,hsa-miR-6891-5p,hsa-miR-497-5p,hsa-miR-761,hsa-miR-424-5p,hsa-miR-6077,hsa-miR-214-3p,hsa-miR-4779,hsa-miR-4530,hsa-miR-7152-5p,hsa-miR-4651,hsa-miR-6752-5p,hsa-miR-7110-5p
hsa_circ_IPCE1	hsa_circ_IPCE1	circRNA	NM_015001	SPEN	protein_coding	4.42521e-09	2.98675e-06	100	31	134	0.231343	195	0.158974	2588	hsa-miR-3619-5p,hsa-miR-5589-5p,hsa-miR-6837-3p,hsa-miR-1323,hsa-miR-608,hsa-miR-6842-5p,hsa-miR-494-5p,hsa-miR-4646-5p,hsa-miR-16-5p,hsa-miR-3692-3p,hsa-miR-195-5p,hsa-miR-15a-5p,hsa-miR-552-3p,hsa-miR-4505,hsa-miR-15b-5p,hsa-miR-323b-5p,hsa-miR-410-5p,hsa-miR-204-3p,hsa-miR-497-5p,hsa-miR-761,hsa-miR-3074-5p,hsa-miR-4291,hsa-miR-922,hsa-miR-1266-3p,hsa-miR-424-5p,hsa-miR-6077,hsa-miR-214-3p,hsa…
hsa_circ_IPCE1	hsa_circ_IPCE1	circRNA	NM_001040084	ANXA8	protein_coding	7.24103e-07	8.25552e-05	589	24	134	0.179104	157	0.152866	2588	hsa-miR-4647,hsa-miR-6858-5p,hsa-miR-545-3p,hsa-miR-4646-5p,hsa-miR-4533,hsa-miR-4685-5p,hsa-miR-216a-3p,hsa-miR-6876-5p,hsa-miR-4505,hsa-miR-3120-3p,hsa-miR-766-5p,hsa-miR-128-3p,hsa-miR-640,hsa-miR-6787-3p,hsa-miR-5787,hsa-miR-204-3p,hsa-miR-4689,hsa-miR-4426,hsa-miR-1252-5p,hsa-miR-6077,hsa-miR-4499,hsa-miR-6837-5p,hsa-miR-4476,hsa-miR-3681-3p
hsa_circ_IPCE1	hsa_circ_IPCE1	circRNA	NM_001004052	OR52B2	protein_coding	0.000182697	0.00338949	3638	18	134	0.134328	138	0.130435	2588	hsa-miR-3619-5p,hsa-miR-4647,hsa-miR-4646-5p,hsa-miR-4662b,hsa-miR-4533,hsa-miR-4701-3p,hsa-miR-1262,hsa-miR-6876-5p,hsa-miR-548e-5p,hsa-miR-6736-5p,hsa-miR-7113-5p,hsa-miR-204-3p,hsa-miR-3605-5p,hsa-miR-761,hsa-miR-4512,hsa-miR-214-3p,hsa-miR-548av-3p,hsa-miR-4476
hsa_circ_IPCE1	hsa_circ_IPCE1	circRNA	NM_001005471	OR2T6	protein_coding	1.16957e-07	2.48236e-05	318	24	134	0.179104	143	0.167832	2588	hsa-miR-3619-5p,hsa-miR-6858-5p,hsa-miR-6842-5p,hsa-miR-16-5p,hsa-miR-195-5p,hsa-miR-15a-5p,hsa-miR-4646-3p,hsa-miR-6838-5p,hsa-miR-766-5p,hsa-miR-15b-5p,hsa-miR-4710,hsa-miR-3605-5p,hsa-miR-497-5p,hsa-miR-761,hsa-miR-4676-3p,hsa-miR-4689,hsa-miR-592,hsa-miR-1266-3p,hsa-miR-452-5p,hsa-miR-424-5p,hsa-miR-214-3p,hsa-miR-4530,hsa-miR-6752-5p,hsa-miR-7110-5p
hsa_circ_IPCE1	hsa_circ_IPCE1	circRNA	NM_001143780	SLC25A39	protein_coding	2.44744e-08	8.88105e-06	185	19	134	0.141791	85	0.223529	2588	hsa-miR-3619-5p,hsa-miR-5589-5p,hsa-miR-608,hsa-miR-545-3p,hsa-miR-6842-5p,hsa-miR-16-5p,hsa-miR-195-5p,hsa-miR-15a-5p,hsa-miR-6838-5p,hsa-miR-4505,hsa-miR-3120-3p,hsa-miR-5787,hsa-miR-497-5p,hsa-miR-761,hsa-miR-424-5p,hsa-miR-214-3p,hsa-miR-4651,hsa-miR-6752-5p,hsa-miR-7110-5p
hsa_circ_IPCE1	hsa_circ_IPCE1	circRNA	UC010CUM.2	DQ580766	protein_coding	3.66807e-08	1.13396e-05	217	22	134	0.164179	115	0.191304	2588	hsa-miR-3619-5p,hsa-miR-16-5p,hsa-miR-195-5p,hsa-miR-15a-5p,hsa-miR-4533,hsa-miR-130b-5p,hsa-miR-6838-5p,hsa-miR-15b-5p,hsa-miR-9500,hsa-miR-497-5p,hsa-miR-761,hsa-miR-4676-3p,hsa-miR-4291,hsa-miR-922,hsa-miR-452-5p,hsa-miR-424-5p,hsa-miR-1252-5p,hsa-miR-214-3p,hsa-miR-4436b-5p,hsa-miR-3692-5p,hsa-miR-892c-3p,hsa-miR-6873-3p
hsa_circ_IPCE1	hsa_circ_IPCE1	circRNA	NM_001278923	ANXA8L1	protein_coding	7.24103e-07	8.25552e-05	590	24	134	0.179104	157	0.152866	2588	hsa-miR-4647,hsa-miR-6858-5p,hsa-miR-545-3p,hsa-miR-4646-5p,hsa-miR-4533,hsa-miR-4685-5p,hsa-miR-216a-3p,hsa-miR-6876-5p,hsa-miR-4505,hsa-miR-3120-3p,hsa-miR-766-5p,hsa-miR-128-3p,hsa-miR-640,hsa-miR-9500,hsa-miR-6787-3p,hsa-miR-5787,hsa-miR-204-3p,hsa-miR-4689,hsa-miR-4426,hsa-miR-1252-5p,hsa-miR-6077,hsa-miR-6837-5p,hsa-miR-4476,hsa-miR-3681-3p
hsa_circ_IPCE1	hsa_circ_IPCE1	circRNA	NM_033179	OR51B4	protein_coding	4.14657e-05	0.00121947	2295	20	134	0.149254	147	0.136054	2588	hsa-miR-3619-5p,hsa-miR-16-5p,hsa-miR-195-5p,hsa-miR-15a-5p,hsa-miR-4701-3p,hsa-miR-1262,hsa-miR-216a-3p,hsa-miR-6838-5p,hsa-miR-6736-5p,hsa-miR-766-5p,hsa-miR-128-3p,hsa-miR-15b-5p,hsa-miR-497-5p,hsa-miR-761,hsa-miR-424-5p,hsa-miR-214-3p,hsa-miR-1257,hsa-miR-3681-3p,hsa-miR-3921,hsa-miR-4653-5p
hsa_circ_IPCE1	hsa_circ_IPCE1	circRNA	NM_003896	ST3GAL5	protein_coding	6.8356e-05	0.00172407	2675	19	134	0.141791	140	0.135714	2588	hsa-miR-3619-5p,hsa-miR-4646-5p,hsa-miR-195-5p,hsa-miR-15a-5p,hsa-miR-6838-5p,hsa-miR-4742-3p,hsa-miR-15b-5p,hsa-miR-204-3p,hsa-miR-497-5p,hsa-miR-761,hsa-miR-4291,hsa-miR-922,hsa-miR-424-5p,hsa-miR-6077,hsa-miR-3918,hsa-miR-214-3p,hsa-miR-5706,hsa-miR-4753-3p,hsa-miR-4782-5p
hsa_circ_IPCE1	hsa_circ_IPCE1	circRNA	NM_001292041	HCLS1	protein_coding	1.00814e-06	0.000101709	669	18	134	0.134328	96	0.1875	2588	hsa-miR-3619-5p,hsa-miR-6818-3p,hsa-miR-608,hsa-miR-6842-5p,hsa-miR-4646-5p,hsa-miR-4533,hsa-miR-6891-3p,hsa-miR-9500,hsa-miR-6732-5p,hsa-miR-204-3p,hsa-miR-761,hsa-miR-6853-3p,hsa-miR-1252-5p,hsa-miR-6072,hsa-miR-214-3p,hsa-miR-4651,hsa-miR-6752-5p,hsa-miR-7110-5p
hsa_circ_IPCE1	hsa_circ_IPCE1	circRNA	NM_001004739	OR5L2	protein_coding	1.5921e-09	1.67901e-06	64	29	134	0.216418	166	0.174699	2588	hsa-miR-3619-5p,hsa-miR-6894-3p,hsa-miR-6858-5p,hsa-miR-6842-5p,hsa-miR-433-3p,hsa-miR-16-5p,hsa-miR-195-5p,hsa-miR-15a-5p,hsa-miR-4533,hsa-miR-216a-3p,hsa-miR-6838-5p,hsa-miR-6876-5p,hsa-miR-128-3p,hsa-miR-4710,hsa-miR-6732-5p,hsa-miR-889-5p,hsa-miR-510-5p,hsa-miR-3605-5p,hsa-miR-497-5p,hsa-miR-761,hsa-miR-4689,hsa-miR-424-5p,hsa-miR-6077,hsa-miR-214-3p,hsa-miR-4530,hsa-miR-4476,hsa-miR-3681-3p,…
hsa_circ_IPCE1	hsa_circ_IPCE1	circRNA	NM_054107	OR1J2	protein_coding	4.58561e-05	0.0012977	2385	20	134	0.149254	148	0.135135	2588	hsa-miR-4752,hsa-miR-6858-5p,hsa-miR-6842-5p,hsa-miR-16-5p,hsa-miR-195-5p,hsa-miR-15a-5p,hsa-miR-130b-5p,hsa-miR-6838-5p,hsa-miR-3173-3p,hsa-miR-766-5p,hsa-miR-15b-5p,hsa-miR-370-3p,hsa-miR-6891-5p,hsa-miR-497-5p,hsa-miR-4512,hsa-miR-1266-3p,hsa-miR-424-5p,hsa-miR-6752-5p,hsa-miR-6893-3p,hsa-miR-7110-5p
hsa_circ_IPCE1	hsa_circ_IPCE1	circRNA	NM_031200	CCR9	protein_coding	1.14477e-08	5.44122e-06	142	32	134	0.238806	214	0.149533	2588	hsa-miR-3619-5p,hsa-miR-4647,hsa-miR-548g-3p,hsa-miR-433-3p,hsa-miR-4662b,hsa-miR-16-5p,hsa-miR-195-5p,hsa-miR-15a-5p,hsa-miR-130b-5p,hsa-miR-216a-3p,hsa-miR-6838-5p,hsa-miR-3166,hsa-miR-4742-3p,hsa-miR-548e-5p,hsa-miR-128-3p,hsa-miR-15b-5p,hsa-miR-497-5p,hsa-miR-761,hsa-miR-4676-3p,hsa-miR-4426,hsa-miR-4312,hsa-miR-424-5p,hsa-miR-1252-5p,hsa-miR-6077,hsa-miR-3918,hsa-miR-214-3p,hsa-miR-4530,hsa-…
hsa_circ_IPCE1	hsa_circ_IPCE1	circRNA	NM_002064	GLRX	protein_coding	8.30802e-07	9.11775e-05	614	27	134	0.201493	193	0.139896	2588	hsa-miR-4647,hsa-miR-4752,hsa-miR-608,hsa-miR-433-3p,hsa-miR-4662b,hsa-miR-16-5p,hsa-miR-195-5p,hsa-miR-15a-5p,hsa-miR-130b-5p,hsa-miR-216a-3p,hsa-miR-6838-5p,hsa-miR-8056,hsa-miR-4742-5p,hsa-miR-128-3p,hsa-miR-15b-5p,hsa-miR-640,hsa-miR-497-5p,hsa-miR-5586-5p,hsa-miR-424-5p,hsa-miR-1252-5p,hsa-miR-3918,hsa-miR-7114-5p,hsa-miR-5706,hsa-miR-4436b-5p,hsa-miR-3681-3p,hsa-miR-4651,hsa-miR-4782-5p
hsa_circ_IPCE1	hsa_circ_IPCE1	circRNA	NM_176812	CHMP4B	protein_coding	7.47756e-11	1.74031e-07	29	26	134	0.19403	119	0.218487	2588	hsa-miR-3619-5p,hsa-miR-4690-5p,hsa-miR-6894-3p,hsa-miR-548g-3p,hsa-miR-6858-5p,hsa-miR-6842-5p,hsa-miR-16-5p,hsa-miR-195-5p,hsa-miR-6838-5p,hsa-miR-552-3p,hsa-miR-3134,hsa-miR-3120-3p,hsa-miR-125a-3p,hsa-miR-766-5p,hsa-miR-15b-5p,hsa-miR-4710,hsa-miR-6732-5p,hsa-miR-497-5p,hsa-miR-4689,hsa-miR-424-5p,hsa-miR-3918,hsa-miR-214-3p,hsa-miR-6809-5p,hsa-miR-6752-5p,hsa-miR-6747-3p,hsa-miR-7110-5p
hsa_circ_IPCE1	hsa_circ_IPCE1	circRNA	NM_181790	GPR142	protein_coding	1.73598e-06	0.00014249	820	26	134	0.19403	188	0.138298	2588	hsa-miR-3619-5p,hsa-miR-3691-5p,hsa-miR-6776-5p,hsa-miR-6895-3p,hsa-miR-608,hsa-miR-15a-5p,hsa-miR-4701-3p,hsa-miR-1262,hsa-miR-6838-5p,hsa-miR-432-3p,hsa-miR-3166,hsa-miR-6736-5p,hsa-miR-15b-5p,hsa-miR-9500,hsa-miR-889-5p,hsa-miR-510-5p,hsa-miR-497-5p,hsa-miR-761,hsa-miR-424-5p,hsa-miR-7114-5p,hsa-miR-214-3p,hsa-miR-4779,hsa-miR-548av-3p,hsa-miR-4530,hsa-miR-3692-5p,hsa-miR-1302
hsa_circ_IPCE1	hsa_circ_IPCE1	circRNA	UC021UBM.2	BC024682	protein_coding	4.86947e-08	1.32662e-05	247	30	134	0.223881	203	0.147783	2588	hsa-miR-3691-5p,hsa-miR-6776-5p,hsa-miR-608,hsa-miR-494-5p,hsa-miR-4646-5p,hsa-miR-141-5p,hsa-miR-16-5p,hsa-miR-195-5p,hsa-miR-15a-5p,hsa-miR-4533,hsa-miR-4701-3p,hsa-miR-1262,hsa-miR-4685-5p,hsa-miR-216a-3p,hsa-miR-6838-5p,hsa-miR-6876-5p,hsa-miR-6736-5p,hsa-miR-128-3p,hsa-miR-15b-5p,hsa-miR-323b-5p,hsa-miR-410-5p,hsa-miR-204-3p,hsa-miR-497-5p,hsa-miR-424-5p,hsa-miR-3918,hsa-miR-4436b-5p,hsa-miR…
hsa_circ_IPCE1	hsa_circ_IPCE1	circRNA	NM_152694	ZCCHC5	protein_coding	6.30858e-07	7.48315e-05	569	20	134	0.149254	113	0.176991	2588	hsa-miR-3691-5p,hsa-miR-3681-5p,hsa-miR-545-3p,hsa-miR-16-5p,hsa-miR-195-5p,hsa-miR-15a-5p,hsa-miR-216a-3p,hsa-miR-6838-5p,hsa-miR-432-3p,hsa-miR-552-3p,hsa-miR-548e-5p,hsa-miR-125a-3p,hsa-miR-128-3p,hsa-miR-15b-5p,hsa-miR-9500,hsa-miR-497-5p,hsa-miR-424-5p,hsa-miR-3681-3p,hsa-miR-4504,hsa-miR-6849-5p
hsa_circ_IPCE1	hsa_circ_IPCE1	circRNA	NM_016463	CXXC5	protein_coding	5.96886e-08	1.5318e-05	263	23	134	0.171642	128	0.179688	2588	hsa-miR-3619-5p,hsa-miR-548g-3p,hsa-miR-3691-5p,hsa-miR-3681-5p,hsa-miR-608,hsa-miR-28-3p,hsa-miR-4782-3p,hsa-miR-4533,hsa-miR-6876-5p,hsa-miR-432-3p,hsa-miR-8056,hsa-miR-3134,hsa-miR-4742-5p,hsa-miR-761,hsa-miR-4291,hsa-miR-6766-3p,hsa-miR-1252-5p,hsa-miR-214-3p,hsa-miR-548av-3p,hsa-miR-4476,hsa-miR-4651,hsa-miR-6849-5p,hsa-miR-4753-3p
hsa_circ_IPCE1	hsa_circ_IPCE1	circRNA	UC003BDS.3	AK056490	protein_coding	8.74529e-08	2.02409e-05	291	31	134	0.231343	220	0.140909	2588	hsa-miR-3619-5p,hsa-miR-1323,hsa-miR-3691-5p,hsa-miR-4752,hsa-miR-3692-3p,hsa-miR-4533,hsa-miR-4685-5p,hsa-miR-216a-3p,hsa-miR-3166,hsa-miR-3134,hsa-miR-4505,hsa-miR-3173-3p,hsa-miR-128-3p,hsa-miR-9500,hsa-miR-6891-5p,hsa-miR-7113-5p,hsa-miR-510-5p,hsa-miR-5787,hsa-miR-761,hsa-miR-922,hsa-miR-1266-3p,hsa-miR-214-3p,hsa-miR-4779,hsa-miR-6837-5p,hsa-miR-6809-5p,hsa-miR-3681-3p,hsa-miR-6752-5p,hsa-m…
hsa_circ_IPCE1	hsa_circ_IPCE1	circRNA	NM_172347	KCNG4	protein_coding	2.46352e-09	2.10472e-06	79	33	134	0.246269	213	0.15493	2588	hsa-miR-3619-5p,hsa-miR-4314,hsa-miR-4690-5p,hsa-miR-6894-3p,hsa-miR-3691-5p,hsa-miR-6818-3p,hsa-miR-4752,hsa-miR-4646-5p,hsa-miR-4298,hsa-miR-16-5p,hsa-miR-195-5p,hsa-miR-15a-5p,hsa-miR-4533,hsa-miR-6838-5p,hsa-miR-6876-5p,hsa-miR-3173-3p,hsa-miR-6736-5p,hsa-miR-15b-5p,hsa-miR-6891-5p,hsa-miR-6787-3p,hsa-miR-204-3p,hsa-miR-497-5p,hsa-miR-761,hsa-miR-424-5p,hsa-miR-1252-5p,hsa-miR-4499,hsa-miR-71…
hsa_circ_IPCE1	hsa_circ_IPCE1	circRNA	NM_001034837	KCNIP1	protein_coding	7.37739e-06	0.000372628	1334	24	134	0.179104	178	0.134831	2588	hsa-miR-5589-5p,hsa-miR-6818-3p,hsa-miR-6895-3p,hsa-miR-6858-5p,hsa-miR-16-5p,hsa-miR-195-5p,hsa-miR-15a-5p,hsa-miR-6838-5p,hsa-miR-4505,hsa-miR-3120-3p,hsa-miR-15b-5p,hsa-miR-5787,hsa-miR-497-5p,hsa-miR-4291,hsa-miR-4689,hsa-miR-922,hsa-miR-452-5p,hsa-miR-424-5p,hsa-miR-6077,hsa-miR-4499,hsa-miR-5706,hsa-miR-892c-3p,hsa-miR-6857-3p,hsa-miR-4782-5p
hsa_circ_IPCE1	hsa_circ_IPCE1	circRNA	NM_170600	SH2D3C	protein_coding	7.43574e-09	4.21738e-06	119	22	134	0.164179	106	0.207547	2588	hsa-miR-3619-5p,hsa-miR-608,hsa-miR-6858-5p,hsa-miR-16-5p,hsa-miR-195-5p,hsa-miR-15a-5p,hsa-miR-216a-3p,hsa-miR-6838-5p,hsa-miR-6876-5p,hsa-miR-128-3p,hsa-miR-15b-5p,hsa-miR-4710,hsa-miR-497-5p,hsa-miR-761,hsa-miR-4689,hsa-miR-1266-3p,hsa-miR-424-5p,hsa-miR-214-3p,hsa-miR-4530,hsa-miR-7152-5p,hsa-miR-3681-3p,hsa-miR-6747-3p
hsa_circ_IPCE1	hsa_circ_IPCE1	circRNA	NM_002595	CDK17	protein_coding	2.13741e-06	0.000162022	890	26	134	0.19403	190	0.136842	2588	hsa-miR-4647,hsa-miR-6858-5p,hsa-miR-433-3p,hsa-miR-4662b,hsa-miR-16-5p,hsa-miR-3692-3p,hsa-miR-195-5p,hsa-miR-15a-5p,hsa-miR-216a-3p,hsa-miR-6838-5p,hsa-miR-128-3p,hsa-miR-15b-5p,hsa-miR-497-5p,hsa-miR-4689,hsa-miR-922,hsa-miR-4426,hsa-miR-6853-3p,hsa-miR-424-5p,hsa-miR-1252-5p,hsa-miR-4436b-5p,hsa-miR-4530,hsa-miR-892a,hsa-miR-1257,hsa-miR-3681-3p,hsa-miR-4504,hsa-miR-4645-3p
hsa_circ_IPCE1	hsa_circ_IPCE1	circRNA	NM_015945	SLC35C2	protein_coding	0.000122612	0.00256767	3221	19	134	0.141791	146	0.130137	2588	hsa-miR-3619-5p,hsa-miR-4690-5p,hsa-miR-216a-3p,hsa-miR-4505,hsa-miR-3173-3p,hsa-miR-125a-3p,hsa-miR-128-3p,hsa-miR-370-3p,hsa-miR-6891-5p,hsa-miR-5787,hsa-miR-204-3p,hsa-miR-761,hsa-miR-3074-5p,hsa-miR-214-3p,hsa-miR-4530,hsa-miR-4504,hsa-miR-3921,hsa-miR-6893-3p,hsa-miR-4653-5p
hsa_circ_IPCE1	hsa_circ_IPCE1	circRNA	NM_014287	NOMO1	protein_coding	2.66747e-11	8.18354e-08	22	22	134	0.164179	81	0.271605	2588	hsa-miR-3619-5p,hsa-miR-3681-5p,hsa-miR-195-5p,hsa-miR-15a-5p,hsa-miR-216a-3p,hsa-miR-6838-5p,hsa-miR-128-3p,hsa-miR-15b-5p,hsa-miR-9500,hsa-miR-4710,hsa-miR-3605-5p,hsa-miR-497-5p,hsa-miR-761,hsa-miR-4291,hsa-miR-922,hsa-miR-424-5p,hsa-miR-214-3p,hsa-miR-4779,hsa-miR-4530,hsa-miR-4504,hsa-miR-6849-5p,hsa-miR-6841-5p
hsa_circ_IPCE1	hsa_circ_IPCE1	circRNA	NM_001970	EIF5A	protein_coding	1.59407e-05	0.00062191	1729	20	134	0.149254	138	0.144928	2588	hsa-miR-608,hsa-miR-6842-5p,hsa-miR-16-5p,hsa-miR-195-5p,hsa-miR-15a-5p,hsa-miR-4685-5p,hsa-miR-6838-5p,hsa-miR-15b-5p,hsa-miR-9500,hsa-miR-6732-5p,hsa-miR-7113-5p,hsa-miR-497-5p,hsa-miR-424-5p,hsa-miR-4762-3p,hsa-miR-3918,hsa-miR-4779,hsa-miR-6837-5p,hsa-miR-4651,hsa-miR-6752-5p,hsa-miR-7110-5p
hsa_circ_IPCE1	hsa_circ_IPCE1	circRNA	NM_001722	POLR3D	protein_coding	1.54245e-06	0.000131608	789	23	134	0.171642	152	0.151316	2588	hsa-miR-4690-5p,hsa-miR-16-5p,hsa-miR-195-5p,hsa-miR-15a-5p,hsa-miR-6838-5p,hsa-miR-6876-5p,hsa-miR-766-5p,hsa-miR-15b-5p,hsa-miR-370-3p,hsa-miR-3605-5p,hsa-miR-497-5p,hsa-miR-761,hsa-miR-922,hsa-miR-4312,hsa-miR-424-5p,hsa-miR-6077,hsa-miR-3918,hsa-miR-214-3p,hsa-miR-4530,hsa-miR-4476,hsa-miR-3692-5p,hsa-miR-6873-3p,hsa-miR-6893-3p
hsa_circ_IPCE1	hsa_circ_IPCE1	circRNA	NM_004800	TM9SF2	protein_coding	1.50182e-05	0.000600142	1689	18	134	0.134328	115	0.156522	2588	hsa-miR-16-5p,hsa-miR-195-5p,hsa-miR-15a-5p,hsa-miR-4668-3p,hsa-miR-216a-3p,hsa-miR-6838-5p,hsa-miR-4742-3p,hsa-miR-128-3p,hsa-miR-15b-5p,hsa-miR-497-5p,hsa-miR-452-5p,hsa-miR-424-5p,hsa-miR-4762-3p,hsa-miR-6077,hsa-miR-3681-3p,hsa-miR-892c-3p,hsa-miR-4645-3p,hsa-miR-6747-3p
hsa_circ_IPCE1	hsa_circ_IPCE1	circRNA	NM_002790	PSMA5	protein_coding	1.2889e-08	5.78604e-06	147	36	134	0.268657	263	0.136882	2588	hsa-miR-4314,hsa-miR-6837-3p,hsa-miR-548g-3p,hsa-miR-6858-5p,hsa-miR-545-3p,hsa-miR-4646-5p,hsa-miR-4298,hsa-miR-16-5p,hsa-miR-195-5p,hsa-miR-15a-5p,hsa-miR-4701-3p,hsa-miR-6891-3p,hsa-miR-1262,hsa-miR-130b-5p,hsa-miR-216a-3p,hsa-miR-6838-5p,hsa-miR-4505,hsa-miR-4742-3p,hsa-miR-6736-5p,hsa-miR-766-5p,hsa-miR-128-3p,hsa-miR-15b-5p,hsa-miR-1468-3p,hsa-miR-6732-5p,hsa-miR-889-5p,hsa-miR-5787,hsa-miR…
hsa_circ_IPCE1	hsa_circ_IPCE1	circRNA	NM_001030311	CERKL	protein_coding	3.32038e-05	0.0010443	2146	22	134	0.164179	169	0.130178	2588	hsa-miR-3619-5p,hsa-miR-4314,hsa-miR-494-5p,hsa-miR-4646-5p,hsa-miR-16-5p,hsa-miR-195-5p,hsa-miR-15a-5p,hsa-miR-216a-3p,hsa-miR-6838-5p,hsa-miR-4742-3p,hsa-miR-128-3p,hsa-miR-15b-5p,hsa-miR-4710,hsa-miR-323b-5p,hsa-miR-410-5p,hsa-miR-204-3p,hsa-miR-497-5p,hsa-miR-761,hsa-miR-4291,hsa-miR-424-5p,hsa-miR-5706,hsa-miR-4782-5p
hsa_circ_IPCE1	hsa_circ_IPCE1	circRNA	NM_014566	OR1D5	protein_coding	6.02426e-06	0.000330034	1232	24	134	0.179104	176	0.136364	2588	hsa-miR-3619-5p,hsa-miR-4314,hsa-miR-6842-5p,hsa-miR-494-5p,hsa-miR-4685-5p,hsa-miR-766-5p,hsa-miR-4710,hsa-miR-6732-5p,hsa-miR-323b-5p,hsa-miR-889-5p,hsa-miR-410-5p,hsa-miR-761,hsa-miR-4689,hsa-miR-592,hsa-miR-1252-5p,hsa-miR-214-3p,hsa-miR-6837-5p,hsa-miR-4476,hsa-miR-1257,hsa-miR-4504,hsa-miR-6752-5p,hsa-miR-6849-5p,hsa-miR-3921,hsa-miR-7110-5p
hsa_circ_IPCE1	hsa_circ_IPCE1	circRNA	NM_001457	FLNB	protein_coding	3.88198e-07	5.56673e-05	470	30	134	0.223881	222	0.135135	2588	hsa-miR-6894-3p,hsa-miR-6858-5p,hsa-miR-545-3p,hsa-miR-6842-5p,hsa-miR-16-5p,hsa-miR-195-5p,hsa-miR-15a-5p,hsa-miR-6838-5p,hsa-miR-6876-5p,hsa-miR-4505,hsa-miR-3120-3p,hsa-miR-4742-5p,hsa-miR-548e-5p,hsa-miR-15b-5p,hsa-miR-510-5p,hsa-miR-5787,hsa-miR-497-5p,hsa-miR-4689,hsa-miR-4312,hsa-miR-424-5p,hsa-miR-6077,hsa-miR-5706,hsa-miR-4436b-5p,hsa-miR-4530,hsa-miR-4476,hsa-miR-6752-5p,hsa-miR-3921,hs…
hsa_circ_IPCE1	hsa_circ_IPCE1	circRNA	NM_177437	TAS2R60	protein_coding	1.51158e-05	0.000602971	1691	22	134	0.164179	161	0.136646	2588	hsa-miR-6894-3p,hsa-miR-608,hsa-miR-16-5p,hsa-miR-195-5p,hsa-miR-15a-5p,hsa-miR-4701-3p,hsa-miR-1262,hsa-miR-216a-3p,hsa-miR-6838-5p,hsa-miR-3166,hsa-miR-6736-5p,hsa-miR-15b-5p,hsa-miR-9500,hsa-miR-1468-3p,hsa-miR-922,hsa-miR-424-5p,hsa-miR-4762-3p,hsa-miR-6077,hsa-miR-4711-3p,hsa-miR-548av-3p,hsa-miR-4530,hsa-miR-7152-5p
hsa_circ_IPCE1	hsa_circ_IPCE1	circRNA	NM_030978	ARPC5L	protein_coding	1.84538e-08	7.35863e-06	169	22	134	0.164179	111	0.198198	2588	hsa-miR-3619-5p,hsa-miR-4314,hsa-miR-4690-5p,hsa-miR-4647,hsa-miR-608,hsa-miR-545-3p,hsa-miR-4646-5p,hsa-miR-4662b,hsa-miR-3692-3p,hsa-miR-552-3p,hsa-miR-8056,hsa-miR-204-3p,hsa-miR-761,hsa-miR-4291,hsa-miR-4512,hsa-miR-922,hsa-miR-4426,hsa-miR-7114-5p,hsa-miR-214-3p,hsa-miR-4436b-5p,hsa-miR-4651,hsa-miR-4653-5p
hsa_circ_IPCE1	hsa_circ_IPCE1	circRNA	NM_000139	MS4A2	protein_coding	4.49877e-08	1.25992e-05	241	33	134	0.246269	238	0.138655	2588	hsa-miR-3619-5p,hsa-miR-6837-3p,hsa-miR-4690-5p,hsa-miR-548g-3p,hsa-miR-3691-5p,hsa-miR-16-5p,hsa-miR-195-5p,hsa-miR-15a-5p,hsa-miR-4782-3p,hsa-miR-216a-3p,hsa-miR-6838-5p,hsa-miR-432-3p,hsa-miR-552-3p,hsa-miR-3134,hsa-miR-4505,hsa-miR-3173-3p,hsa-miR-4742-5p,hsa-miR-4742-3p,hsa-miR-128-3p,hsa-miR-15b-5p,hsa-miR-6891-5p,hsa-miR-5787,hsa-miR-497-5p,hsa-miR-761,hsa-miR-922,hsa-miR-6766-3p,hsa-miR-4…
hsa_circ_IPCE1	hsa_circ_IPCE1	circRNA	NM_024535	CORO7	protein_coding	6.70976e-05	0.00170439	2652	18	134	0.134328	128	0.140625	2588	hsa-miR-3619-5p,hsa-miR-4690-5p,hsa-miR-4646-5p,hsa-miR-141-5p,hsa-miR-4685-5p,hsa-miR-6838-5p,hsa-miR-4505,hsa-miR-4742-5p,hsa-miR-5787,hsa-miR-204-3p,hsa-miR-3605-5p,hsa-miR-497-5p,hsa-miR-761,hsa-miR-4291,hsa-miR-922,hsa-miR-3918,hsa-miR-214-3p,hsa-miR-6837-5p
hsa_circ_IPCE1	hsa_circ_IPCE1	circRNA	NM_004259	RECQL5	protein_coding	0.000101595	0.00225338	3043	18	134	0.134328	132	0.136364	2588	hsa-miR-3619-5p,hsa-miR-6842-5p,hsa-miR-6838-5p,hsa-miR-125a-3p,hsa-miR-4710,hsa-miR-6732-5p,hsa-miR-761,hsa-miR-4291,hsa-miR-4512,hsa-miR-1298-3p,hsa-miR-6072,hsa-miR-214-3p,hsa-miR-4530,hsa-miR-6809-5p,hsa-miR-6752-5p,hsa-miR-3921,hsa-miR-7110-5p,hsa-miR-4653-5p
hsa_circ_IPCE1	hsa_circ_IPCE1	circRNA	NM_018457	PRR13	protein_coding	2.63347e-11	8.18354e-08	21	26	134	0.19403	114	0.22807	2588	hsa-miR-3619-5p,hsa-miR-4647,hsa-miR-608,hsa-miR-6842-5p,hsa-miR-4662b,hsa-miR-16-5p,hsa-miR-3692-3p,hsa-miR-195-5p,hsa-miR-15a-5p,hsa-miR-6838-5p,hsa-miR-3173-3p,hsa-miR-15b-5p,hsa-miR-4710,hsa-miR-6732-5p,hsa-miR-370-3p,hsa-miR-6891-5p,hsa-miR-510-5p,hsa-miR-497-5p,hsa-miR-761,hsa-miR-424-5p,hsa-miR-214-3p,hsa-miR-4651,hsa-miR-3692-5p,hsa-miR-6752-5p,hsa-miR-6747-3p,hsa-miR-7110-5p
hsa_circ_IPCE1	hsa_circ_IPCE1	circRNA	NM_001001667	OR6V1	protein_coding	1.82139e-05	0.000681546	1802	23	134	0.171642	175	0.131429	2588	hsa-miR-3619-5p,hsa-miR-4647,hsa-miR-6842-5p,hsa-miR-4662b,hsa-miR-4533,hsa-miR-216a-3p,hsa-miR-6876-5p,hsa-miR-3173-3p,hsa-miR-6732-5p,hsa-miR-6891-5p,hsa-miR-7113-5p,hsa-miR-761,hsa-miR-4676-3p,hsa-miR-4512,hsa-miR-4426,hsa-miR-214-3p,hsa-miR-4530,hsa-miR-4476,hsa-miR-3681-3p,hsa-miR-3692-5p,hsa-miR-892c-3p,hsa-miR-6752-5p,hsa-miR-7110-5p
hsa_circ_IPCE1	hsa_circ_IPCE1	circRNA	NM_001005184	OR6K6	protein_coding	3.87106e-06	0.000242896	1074	23	134	0.171642	160	0.14375	2588	hsa-miR-3681-5p,hsa-miR-16-5p,hsa-miR-195-5p,hsa-miR-15a-5p,hsa-miR-4533,hsa-miR-130b-5p,hsa-miR-6838-5p,hsa-miR-6876-5p,hsa-miR-432-3p,hsa-miR-552-3p,hsa-miR-8056,hsa-miR-3120-3p,hsa-miR-3173-3p,hsa-miR-15b-5p,hsa-miR-6891-5p,hsa-miR-497-5p,hsa-miR-592,hsa-miR-4312,hsa-miR-3918,hsa-miR-4476,hsa-miR-6809-5p,hsa-miR-892a,hsa-miR-6849-5p
hsa_circ_IPCE1	hsa_circ_IPCE1	circRNA	NM_004469	FIGF	protein_coding	1.44945e-07	2.85217e-05	343	18	134	0.134328	85	0.211765	2588	hsa-miR-1323,hsa-miR-4646-5p,hsa-miR-16-5p,hsa-miR-195-5p,hsa-miR-6891-3p,hsa-miR-6838-5p,hsa-miR-3120-3p,hsa-miR-7113-5p,hsa-miR-204-3p,hsa-miR-497-5p,hsa-miR-6853-3p,hsa-miR-424-5p,hsa-miR-6072,hsa-miR-5706,hsa-miR-1257,hsa-miR-3921,hsa-miR-4645-3p,hsa-miR-4653-5p
hsa_circ_IPCE1	hsa_circ_IPCE1	circRNA	NM_002570	PCSK6	protein_coding	2.00463e-05	0.000729414	1853	23	134	0.171642	176	0.130682	2588	hsa-miR-4752,hsa-miR-16-5p,hsa-miR-195-5p,hsa-miR-15a-5p,hsa-miR-130b-5p,hsa-miR-6838-5p,hsa-miR-6876-5p,hsa-miR-432-3p,hsa-miR-552-3p,hsa-miR-8056,hsa-miR-3134,hsa-miR-548e-5p,hsa-miR-766-5p,hsa-miR-15b-5p,hsa-miR-889-5p,hsa-miR-3605-5p,hsa-miR-592,hsa-miR-424-5p,hsa-miR-7114-5p,hsa-miR-4476,hsa-miR-892a,hsa-miR-4504,hsa-miR-4753-3p
hsa_circ_IPCE1	hsa_circ_IPCE1	circRNA	NM_001736	C5AR1	protein_coding	5.17419e-09	3.39055e-06	103	33	134	0.246269	219	0.150685	2588	hsa-miR-4314,hsa-miR-5589-5p,hsa-miR-6837-3p,hsa-miR-4647,hsa-miR-6776-5p,hsa-miR-608,hsa-miR-6842-5p,hsa-miR-4646-5p,hsa-miR-4533,hsa-miR-4701-3p,hsa-miR-145-3p,hsa-miR-1262,hsa-miR-6876-5p,hsa-miR-8056,hsa-miR-4505,hsa-miR-3173-3p,hsa-miR-4742-5p,hsa-miR-4742-3p,hsa-miR-6736-5p,hsa-miR-640,hsa-miR-9500,hsa-miR-6891-5p,hsa-miR-5787,hsa-miR-204-3p,hsa-miR-1266-3p,hsa-miR-1252-5p,hsa-miR-4779,hsa-…
hsa_circ_IPCE1	hsa_circ_IPCE1	circRNA	NM_003684	MKNK1	protein_coding	7.439e-13	7.17268e-09	7	36	134	0.268657	190	0.189474	2588	hsa-miR-3619-5p,hsa-miR-4314,hsa-miR-4690-5p,hsa-miR-6894-3p,hsa-miR-6818-3p,hsa-miR-545-3p,hsa-miR-4646-5p,hsa-miR-16-5p,hsa-miR-195-5p,hsa-miR-15a-5p,hsa-miR-4533,hsa-miR-6838-5p,hsa-miR-6876-5p,hsa-miR-3166,hsa-miR-3120-3p,hsa-miR-4742-5p,hsa-miR-548e-5p,hsa-miR-15b-5p,hsa-miR-9500,hsa-miR-370-3p,hsa-miR-889-5p,hsa-miR-204-3p,hsa-miR-497-5p,hsa-miR-3074-5p,hsa-miR-4291,hsa-miR-4512,hsa-miR-922…
hsa_circ_IPCE1	hsa_circ_IPCE1	circRNA	NM_004628	XPC	protein_coding	2.7424e-05	0.000909193	2035	20	134	0.149254	143	0.13986	2588	hsa-miR-6776-5p,hsa-miR-4662b,hsa-miR-15a-5p,hsa-miR-28-3p,hsa-miR-4701-3p,hsa-miR-1262,hsa-miR-4685-5p,hsa-miR-6838-5p,hsa-miR-6736-5p,hsa-miR-15b-5p,hsa-miR-6787-3p,hsa-miR-510-5p,hsa-miR-5787,hsa-miR-497-5p,hsa-miR-4291,hsa-miR-922,hsa-miR-4426,hsa-miR-424-5p,hsa-miR-6837-5p,hsa-miR-4530
hsa_circ_IPCE1	hsa_circ_IPCE1	circRNA	NM_145109	MAP2K3	protein_coding	1.05367e-07	2.30897e-05	308	29	134	0.216418	198	0.146465	2588	hsa-miR-3619-5p,hsa-miR-6894-3p,hsa-miR-6776-5p,hsa-miR-608,hsa-miR-4298,hsa-miR-16-5p,hsa-miR-15a-5p,hsa-miR-4701-3p,hsa-miR-1262,hsa-miR-6838-5p,hsa-miR-432-3p,hsa-miR-4505,hsa-miR-3120-3p,hsa-miR-6736-5p,hsa-miR-6732-5p,hsa-miR-370-3p,hsa-miR-5787,hsa-miR-497-5p,hsa-miR-761,hsa-miR-214-3p,hsa-miR-1257,hsa-miR-4651,hsa-miR-3692-5p,hsa-miR-1302,hsa-miR-6752-5p,hsa-miR-3921,hsa-miR-6893-3p,hsa-mi…
hsa_circ_IPCE1	hsa_circ_IPCE1	circRNA	NM_001286134	RIC8A	protein_coding	6.78746e-05	0.00171642	2668	20	134	0.149254	152	0.131579	2588	hsa-miR-4647,hsa-miR-4752,hsa-miR-4646-5p,hsa-miR-4662b,hsa-miR-16-5p,hsa-miR-195-5p,hsa-miR-15a-5p,hsa-miR-4533,hsa-miR-6838-5p,hsa-miR-6876-5p,hsa-miR-3166,hsa-miR-3173-3p,hsa-miR-15b-5p,hsa-miR-204-3p,hsa-miR-497-5p,hsa-miR-4426,hsa-miR-424-5p,hsa-miR-4762-3p,hsa-miR-7114-5p,hsa-miR-4476
hsa_circ_IPCE1	hsa_circ_IPCE1	circRNA	NM_007184	NISCH	protein_coding	2.88919e-07	4.59808e-05	422	21	134	0.156716	118	0.177966	2588	hsa-miR-3619-5p,hsa-miR-16-5p,hsa-miR-195-5p,hsa-miR-15a-5p,hsa-miR-216a-3p,hsa-miR-6838-5p,hsa-miR-3166,hsa-miR-3120-3p,hsa-miR-128-3p,hsa-miR-370-3p,hsa-miR-497-5p,hsa-miR-761,hsa-miR-922,hsa-miR-424-5p,hsa-miR-214-3p,hsa-miR-5706,hsa-miR-4436b-5p,hsa-miR-3681-3p,hsa-miR-4651,hsa-miR-4782-5p,hsa-miR-6893-3p
hsa_circ_IPCE1	hsa_circ_IPCE1	circRNA	NM_004693	KRT75	protein_coding	3.66807e-08	1.13396e-05	218	22	134	0.164179	115	0.191304	2588	hsa-miR-3619-5p,hsa-miR-4690-5p,hsa-miR-4646-5p,hsa-miR-195-5p,hsa-miR-15a-5p,hsa-miR-4533,hsa-miR-4701-3p,hsa-miR-1262,hsa-miR-6876-5p,hsa-miR-552-3p,hsa-miR-3173-3p,hsa-miR-6736-5p,hsa-miR-15b-5p,hsa-miR-6891-5p,hsa-miR-204-3p,hsa-miR-497-5p,hsa-miR-214-3p,hsa-miR-4779,hsa-miR-4530,hsa-miR-4476,hsa-miR-4504,hsa-miR-3692-5p
hsa_circ_IPCE1	hsa_circ_IPCE1	circRNA	NM_138777	MRRF	protein_coding	2.48924e-05	0.000855878	1963	22	134	0.164179	166	0.13253	2588	hsa-miR-6858-5p,hsa-miR-16-5p,hsa-miR-195-5p,hsa-miR-15a-5p,hsa-miR-6838-5p,hsa-miR-552-3p,hsa-miR-4505,hsa-miR-3173-3p,hsa-miR-4742-5p,hsa-miR-125a-3p,hsa-miR-15b-5p,hsa-miR-6891-5p,hsa-miR-5787,hsa-miR-3605-5p,hsa-miR-497-5p,hsa-miR-5586-5p,hsa-miR-4689,hsa-miR-922,hsa-miR-424-5p,hsa-miR-6077,hsa-miR-4779,hsa-miR-4530
hsa_circ_IPCE1	hsa_circ_IPCE1	circRNA	NM_058222	TECTB	protein_coding	1.20581e-05	0.000516074	1577	24	134	0.179104	183	0.131148	2588	hsa-miR-1323,hsa-miR-608,hsa-miR-545-3p,hsa-miR-16-5p,hsa-miR-195-5p,hsa-miR-15a-5p,hsa-miR-6838-5p,hsa-miR-3120-3p,hsa-miR-15b-5p,hsa-miR-6787-3p,hsa-miR-497-5p,hsa-miR-4291,hsa-miR-5586-5p,hsa-miR-592,hsa-miR-424-5p,hsa-miR-4762-3p,hsa-miR-5706,hsa-miR-548av-3p,hsa-miR-4530,hsa-miR-1257,hsa-miR-4651,hsa-miR-3921,hsa-miR-4782-5p,hsa-miR-4653-5p
hsa_circ_IPCE1	hsa_circ_IPCE1	circRNA	NM_014555	TRPM5	protein_coding	3.31991e-07	5.12755e-05	437	19	134	0.141791	99	0.191919	2588	hsa-miR-608,hsa-miR-6858-5p,hsa-miR-6842-5p,hsa-miR-3692-3p,hsa-miR-4701-3p,hsa-miR-1262,hsa-miR-216a-3p,hsa-miR-432-3p,hsa-miR-6736-5p,hsa-miR-128-3p,hsa-miR-4710,hsa-miR-4689,hsa-miR-3918,hsa-miR-4779,hsa-miR-3681-3p,hsa-miR-4651,hsa-miR-3692-5p,hsa-miR-6752-5p,hsa-miR-7110-5p
hsa_circ_IPCE1	hsa_circ_IPCE1	circRNA	UC003GSX.4	AX748249	protein_coding	2.1684e-05	0.000772725	1894	18	134	0.134328	118	0.152542	2588	hsa-miR-4314,hsa-miR-5589-5p,hsa-miR-16-5p,hsa-miR-3692-3p,hsa-miR-195-5p,hsa-miR-15a-5p,hsa-miR-6838-5p,hsa-miR-15b-5p,hsa-miR-6891-5p,hsa-miR-889-5p,hsa-miR-3605-5p,hsa-miR-497-5p,hsa-miR-5586-5p,hsa-miR-424-5p,hsa-miR-1298-3p,hsa-miR-6077,hsa-miR-4779,hsa-miR-4530
hsa_circ_IPCE1	hsa_circ_IPCE1	circRNA	NM_003598	TEAD2	protein_coding	1.54245e-06	0.000131608	790	23	134	0.171642	152	0.151316	2588	hsa-miR-6837-3p,hsa-miR-608,hsa-miR-6842-5p,hsa-miR-494-5p,hsa-miR-4646-5p,hsa-miR-4533,hsa-miR-501-5p,hsa-miR-4685-5p,hsa-miR-6876-5p,hsa-miR-766-5p,hsa-miR-410-5p,hsa-miR-5787,hsa-miR-204-3p,hsa-miR-1266-3p,hsa-miR-1252-5p,hsa-miR-3918,hsa-miR-6837-5p,hsa-miR-4476,hsa-miR-4651,hsa-miR-6752-5p,hsa-miR-3921,hsa-miR-7110-5p,hsa-miR-4653-5p
hsa_circ_IPCE1	hsa_circ_IPCE1	circRNA	NM_000733	CD3E	protein_coding	1.21236e-07	2.51775e-05	325	26	134	0.19403	165	0.157576	2588	hsa-miR-608,hsa-miR-6858-5p,hsa-miR-6842-5p,hsa-miR-16-5p,hsa-miR-195-5p,hsa-miR-15a-5p,hsa-miR-6838-5p,hsa-miR-3173-3p,hsa-miR-15b-5p,hsa-miR-9500,hsa-miR-6732-5p,hsa-miR-6891-5p,hsa-miR-6787-3p,hsa-miR-497-5p,hsa-miR-4512,hsa-miR-4689,hsa-miR-922,hsa-miR-424-5p,hsa-miR-6077,hsa-miR-3918,hsa-miR-4779,hsa-miR-4530,hsa-miR-4651,hsa-miR-6752-5p,hsa-miR-6873-3p,hsa-miR-7110-5p
hsa_circ_IPCE1	hsa_circ_IPCE1	circRNA	NM_178148	SLC35B2	protein_coding	0.000112356	0.00241971	3134	18	134	0.134328	133	0.135338	2588	hsa-miR-4647,hsa-miR-4646-5p,hsa-miR-4662b,hsa-miR-195-5p,hsa-miR-4701-3p,hsa-miR-1262,hsa-miR-6838-5p,hsa-miR-15b-5p,hsa-miR-9500,hsa-miR-370-3p,hsa-miR-204-3p,hsa-miR-497-5p,hsa-miR-922,hsa-miR-4426,hsa-miR-424-5p,hsa-miR-6077,hsa-miR-548av-3p,hsa-miR-6893-3p
hsa_circ_IPCE1	hsa_circ_IPCE1	circRNA	NM_017797	BTBD2	protein_coding	4.61371e-06	0.000273396	1139	22	134	0.164179	150	0.146667	2588	hsa-miR-3691-5p,hsa-miR-608,hsa-miR-6858-5p,hsa-miR-6842-5p,hsa-miR-15a-5p,hsa-miR-4782-3p,hsa-miR-4685-5p,hsa-miR-15b-5p,hsa-miR-7113-5p,hsa-miR-497-5p,hsa-miR-5586-5p,hsa-miR-4512,hsa-miR-4689,hsa-miR-922,hsa-miR-6766-3p,hsa-miR-424-5p,hsa-miR-1298-3p,hsa-miR-3918,hsa-miR-6837-5p,hsa-miR-4530,hsa-miR-6752-5p,hsa-miR-7110-5p
hsa_circ_IPCE1	hsa_circ_IPCE1	circRNA	NM_001005238	OR51G2	protein_coding	1.06647e-07	2.32888e-05	309	26	134	0.19403	164	0.158537	2588	hsa-miR-3619-5p,hsa-miR-4690-5p,hsa-miR-6894-3p,hsa-miR-608,hsa-miR-16-5p,hsa-miR-195-5p,hsa-miR-15a-5p,hsa-miR-4533,hsa-miR-216a-3p,hsa-miR-6838-5p,hsa-miR-6876-5p,hsa-miR-3134,hsa-miR-15b-5p,hsa-miR-7113-5p,hsa-miR-3605-5p,hsa-miR-497-5p,hsa-miR-761,hsa-miR-4291,hsa-miR-4512,hsa-miR-424-5p,hsa-miR-6077,hsa-miR-214-3p,hsa-miR-4476,hsa-miR-1257,hsa-miR-4651,hsa-miR-4645-3p
hsa_circ_IPCE1	hsa_circ_IPCE1	circRNA	NM_001005326	OR4F6	protein_coding	3.3529e-06	0.000219071	1033	21	134	0.156716	136	0.154412	2588	hsa-miR-3619-5p,hsa-miR-4647,hsa-miR-6858-5p,hsa-miR-433-3p,hsa-miR-4662b,hsa-miR-16-5p,hsa-miR-195-5p,hsa-miR-15a-5p,hsa-miR-6838-5p,hsa-miR-766-5p,hsa-miR-15b-5p,hsa-miR-497-5p,hsa-miR-761,hsa-miR-4689,hsa-miR-4426,hsa-miR-424-5p,hsa-miR-6077,hsa-miR-7114-5p,hsa-miR-214-3p,hsa-miR-4530,hsa-miR-6809-5p
hsa_circ_IPCE1	hsa_circ_IPCE1	circRNA	NM_018031	WDR6	protein_coding	3.08832e-05	0.000991618	2099	18	134	0.134328	121	0.14876	2588	hsa-miR-3619-5p,hsa-miR-5589-5p,hsa-miR-4690-5p,hsa-miR-6818-3p,hsa-miR-608,hsa-miR-6842-5p,hsa-miR-4646-5p,hsa-miR-3120-3p,hsa-miR-548e-5p,hsa-miR-204-3p,hsa-miR-3605-5p,hsa-miR-452-5p,hsa-miR-214-3p,hsa-miR-4530,hsa-miR-4651,hsa-miR-6752-5p,hsa-miR-4753-3p,hsa-miR-7110-5p
hsa_circ_IPCE1	hsa_circ_IPCE1	circRNA	NM_006058	TNIP1	protein_coding	1.22505e-06	0.000115803	714	22	134	0.164179	139	0.158273	2588	hsa-miR-3619-5p,hsa-miR-6776-5p,hsa-miR-16-5p,hsa-miR-195-5p,hsa-miR-15a-5p,hsa-miR-4533,hsa-miR-6838-5p,hsa-miR-15b-5p,hsa-miR-9500,hsa-miR-6732-5p,hsa-miR-7113-5p,hsa-miR-497-5p,hsa-miR-761,hsa-miR-5586-5p,hsa-miR-4512,hsa-miR-922,hsa-miR-424-5p,hsa-miR-1298-3p,hsa-miR-3918,hsa-miR-214-3p,hsa-miR-4530,hsa-miR-4476
hsa_circ_IPCE1	hsa_circ_IPCE1	circRNA	NM_001004460	OR10A2	protein_coding	1.65569e-05	0.000641131	1743	21	134	0.156716	150	0.14	2588	hsa-miR-433-3p,hsa-miR-4646-5p,hsa-miR-16-5p,hsa-miR-195-5p,hsa-miR-15a-5p,hsa-miR-4533,hsa-miR-6838-5p,hsa-miR-6876-5p,hsa-miR-552-3p,hsa-miR-3173-3p,hsa-miR-125a-3p,hsa-miR-766-5p,hsa-miR-15b-5p,hsa-miR-4710,hsa-miR-370-3p,hsa-miR-6891-5p,hsa-miR-3605-5p,hsa-miR-497-5p,hsa-miR-424-5p,hsa-miR-4476,hsa-miR-6893-3p
hsa_circ_IPCE1	hsa_circ_IPCE1	circRNA	NM_152438	DDX11	protein_coding	7.95704e-06	0.000393445	1365	25	134	0.186567	191	0.13089	2588	hsa-miR-3619-5p,hsa-miR-3691-5p,hsa-miR-3681-5p,hsa-miR-4298,hsa-miR-4533,hsa-miR-4646-3p,hsa-miR-4685-5p,hsa-miR-216a-3p,hsa-miR-6876-5p,hsa-miR-3173-3p,hsa-miR-766-5p,hsa-miR-6891-5p,hsa-miR-510-5p,hsa-miR-761,hsa-miR-4291,hsa-miR-4512,hsa-miR-1298-3p,hsa-miR-3918,hsa-miR-214-3p,hsa-miR-4779,hsa-miR-4711-3p,hsa-miR-6837-5p,hsa-miR-4476,hsa-miR-3681-3p,hsa-miR-6849-5p
hsa_circ_IPCE1	hsa_circ_IPCE1	circRNA	NM_015645	C1QTNF5	protein_coding	1.66512e-07	3.15934e-05	354	19	134	0.141791	95	0.2	2588	hsa-miR-3619-5p,hsa-miR-608,hsa-miR-6842-5p,hsa-miR-494-5p,hsa-miR-6838-5p,hsa-miR-3166,hsa-miR-6732-5p,hsa-miR-323b-5p,hsa-miR-410-5p,hsa-miR-761,hsa-miR-5586-5p,hsa-miR-6077,hsa-miR-214-3p,hsa-miR-4530,hsa-miR-4651,hsa-miR-6752-5p,hsa-miR-3921,hsa-miR-7110-5p,hsa-miR-4653-5p
hsa_circ_IPCE1	hsa_circ_IPCE1	circRNA	NM_001004738	OR5L1	protein_coding	1.18275e-07	2.49463e-05	320	27	134	0.201493	176	0.153409	2588	hsa-miR-3619-5p,hsa-miR-6894-3p,hsa-miR-6858-5p,hsa-miR-6842-5p,hsa-miR-433-3p,hsa-miR-16-5p,hsa-miR-195-5p,hsa-miR-15a-5p,hsa-miR-4533,hsa-miR-216a-3p,hsa-miR-6838-5p,hsa-miR-6876-5p,hsa-miR-128-3p,hsa-miR-4710,hsa-miR-510-5p,hsa-miR-3605-5p,hsa-miR-761,hsa-miR-4689,hsa-miR-424-5p,hsa-miR-6077,hsa-miR-214-3p,hsa-miR-4530,hsa-miR-4476,hsa-miR-892a,hsa-miR-3681-3p,hsa-miR-6752-5p,hsa-miR-7110-5p
hsa_circ_IPCE1	hsa_circ_IPCE1	circRNA	NM_020808	SIPA1L2	protein_coding	2.25717e-05	0.000790993	1926	22	134	0.164179	165	0.133333	2588	hsa-miR-545-3p,hsa-miR-16-5p,hsa-miR-195-5p,hsa-miR-15a-5p,hsa-miR-6891-3p,hsa-miR-6838-5p,hsa-miR-3120-3p,hsa-miR-548e-5p,hsa-miR-15b-5p,hsa-miR-9500,hsa-miR-370-3p,hsa-miR-497-5p,hsa-miR-3074-5p,hsa-miR-4676-3p,hsa-miR-922,hsa-miR-452-5p,hsa-miR-424-5p,hsa-miR-7114-5p,hsa-miR-6072,hsa-miR-4530,hsa-miR-1257,hsa-miR-892c-3p
hsa_circ_IPCE1	hsa_circ_IPCE1	circRNA	NM_007255	B4GALT7	protein_coding	2.57666e-06	0.000185999	935	20	134	0.149254	123	0.162602	2588	hsa-miR-3619-5p,hsa-miR-6842-5p,hsa-miR-494-5p,hsa-miR-4533,hsa-miR-6876-5p,hsa-miR-3173-3p,hsa-miR-6891-5p,hsa-miR-323b-5p,hsa-miR-410-5p,hsa-miR-761,hsa-miR-5586-5p,hsa-miR-1266-3p,hsa-miR-4312,hsa-miR-214-3p,hsa-miR-4530,hsa-miR-4476,hsa-miR-892a,hsa-miR-6752-5p,hsa-miR-6747-3p,hsa-miR-7110-5p
hsa_circ_IPCE1	hsa_circ_IPCE1	circRNA	NM_001004728	OR5A1	protein_coding	8.1912e-06	0.000399463	1384	23	134	0.171642	167	0.137725	2588	hsa-miR-5589-5p,hsa-miR-16-5p,hsa-miR-195-5p,hsa-miR-15a-5p,hsa-miR-4646-3p,hsa-miR-6838-5p,hsa-miR-6876-5p,hsa-miR-432-3p,hsa-miR-3166,hsa-miR-766-5p,hsa-miR-15b-5p,hsa-miR-889-5p,hsa-miR-3605-5p,hsa-miR-497-5p,hsa-miR-4512,hsa-miR-922,hsa-miR-424-5p,hsa-miR-5706,hsa-miR-4779,hsa-miR-4476,hsa-miR-6857-3p,hsa-miR-4753-3p,hsa-miR-4782-5p
hsa_circ_IPCE1	hsa_circ_IPCE1	circRNA	NM_181600	KRTAP13-4	protein_coding	1.83621e-06	0.000148069	837	19	134	0.141791	110	0.172727	2588	hsa-miR-3619-5p,hsa-miR-16-5p,hsa-miR-195-5p,hsa-miR-15a-5p,hsa-miR-4533,hsa-miR-15b-5p,hsa-miR-9500,hsa-miR-510-5p,hsa-miR-3605-5p,hsa-miR-497-5p,hsa-miR-761,hsa-miR-922,hsa-miR-424-5p,hsa-miR-1252-5p,hsa-miR-214-3p,hsa-miR-5706,hsa-miR-4530,hsa-miR-3692-5p,hsa-miR-4782-5p
hsa_circ_IPCE1	hsa_circ_IPCE1	circRNA	NM_001243186	PIM1	protein_coding	2.04396e-07	3.70847e-05	372	31	134	0.231343	228	0.135965	2588	hsa-miR-3619-5p,hsa-miR-4690-5p,hsa-miR-6842-5p,hsa-miR-16-5p,hsa-miR-195-5p,hsa-miR-15a-5p,hsa-miR-6838-5p,hsa-miR-6876-5p,hsa-miR-3173-3p,hsa-miR-766-5p,hsa-miR-15b-5p,hsa-miR-4710,hsa-miR-6732-5p,hsa-miR-370-3p,hsa-miR-6891-5p,hsa-miR-7113-5p,hsa-miR-761,hsa-miR-4291,hsa-miR-922,hsa-miR-424-5p,hsa-miR-1252-5p,hsa-miR-6077,hsa-miR-214-3p,hsa-miR-4779,hsa-miR-4530,hsa-miR-4476,hsa-miR-7152-5p,hs…
hsa_circ_IPCE1	hsa_circ_IPCE1	circRNA	NM_001190844	TMEM221	protein_coding	4.81985e-06	0.000280133	1153	23	134	0.171642	162	0.141975	2588	hsa-miR-3681-5p,hsa-miR-6858-5p,hsa-miR-4646-5p,hsa-miR-16-5p,hsa-miR-195-5p,hsa-miR-15a-5p,hsa-miR-501-5p,hsa-miR-6891-3p,hsa-miR-6838-5p,hsa-miR-8056,hsa-miR-125a-3p,hsa-miR-15b-5p,hsa-miR-204-3p,hsa-miR-497-5p,hsa-miR-4291,hsa-miR-4689,hsa-miR-5089-3p,hsa-miR-424-5p,hsa-miR-3918,hsa-miR-4711-3p,hsa-miR-6752-5p,hsa-miR-6849-5p,hsa-miR-7110-5p
hsa_circ_IPCE1	hsa_circ_IPCE1	circRNA	NM_000128	F11	protein_coding	6.02982e-05	0.00158049	2575	18	134	0.134328	127	0.141732	2588	hsa-miR-16-5p,hsa-miR-3692-3p,hsa-miR-15a-5p,hsa-miR-28-3p,hsa-miR-4668-3p,hsa-miR-145-3p,hsa-miR-216a-3p,hsa-miR-6838-5p,hsa-miR-766-5p,hsa-miR-128-3p,hsa-miR-15b-5p,hsa-miR-497-5p,hsa-miR-3074-5p,hsa-miR-424-5p,hsa-miR-4499,hsa-miR-7114-5p,hsa-miR-3681-3p,hsa-miR-4504
hsa_circ_IPCE1	hsa_circ_IPCE1	circRNA	NM_006052	DSCR3	protein_coding	3.82721e-09	2.80776e-06	92	37	134	0.276119	264	0.140152	2588	hsa-miR-4314,hsa-miR-6776-5p,hsa-miR-6895-3p,hsa-miR-608,hsa-miR-4646-5p,hsa-miR-16-5p,hsa-miR-195-5p,hsa-miR-15a-5p,hsa-miR-4533,hsa-miR-4701-3p,hsa-miR-4646-3p,hsa-miR-1262,hsa-miR-6838-5p,hsa-miR-6876-5p,hsa-miR-4505,hsa-miR-6736-5p,hsa-miR-125a-3p,hsa-miR-15b-5p,hsa-miR-9500,hsa-miR-6787-3p,hsa-miR-510-5p,hsa-miR-5787,hsa-miR-204-3p,hsa-miR-497-5p,hsa-miR-3074-5p,hsa-miR-4676-3p,hsa-miR-5089-…
hsa_circ_IPCE1	hsa_circ_IPCE1	circRNA	NM_001037163	FAM220A	protein_coding	2.48114e-07	4.13487e-05	405	20	134	0.149254	107	0.186916	2588	hsa-miR-3619-5p,hsa-miR-4314,hsa-miR-1323,hsa-miR-4646-5p,hsa-miR-4298,hsa-miR-4533,hsa-miR-4701-3p,hsa-miR-1262,hsa-miR-6736-5p,hsa-miR-204-3p,hsa-miR-761,hsa-miR-4512,hsa-miR-1252-5p,hsa-miR-1298-3p,hsa-miR-3918,hsa-miR-214-3p,hsa-miR-4436b-5p,hsa-miR-1302,hsa-miR-4645-3p,hsa-miR-6841-5p
hsa_circ_IPCE1	hsa_circ_IPCE1	circRNA	NM_002712	PPP1R7	protein_coding	0.000124111	0.00258542	3239	18	134	0.134328	134	0.134328	2588	hsa-miR-5589-5p,hsa-miR-4298,hsa-miR-16-5p,hsa-miR-195-5p,hsa-miR-15a-5p,hsa-miR-6838-5p,hsa-miR-552-3p,hsa-miR-4505,hsa-miR-4742-5p,hsa-miR-15b-5p,hsa-miR-510-5p,hsa-miR-5787,hsa-miR-497-5p,hsa-miR-424-5p,hsa-miR-1252-5p,hsa-miR-4711-3p,hsa-miR-6809-5p,hsa-miR-6873-3p
hsa_circ_IPCE1	hsa_circ_IPCE1	circRNA	NM_080618	CTCFL	protein_coding	6.78746e-05	0.00171642	2669	20	134	0.149254	152	0.131579	2588	hsa-miR-608,hsa-miR-6858-5p,hsa-miR-545-3p,hsa-miR-4646-5p,hsa-miR-3692-3p,hsa-miR-4685-5p,hsa-miR-548e-5p,hsa-miR-370-3p,hsa-miR-204-3p,hsa-miR-3074-5p,hsa-miR-5586-5p,hsa-miR-4689,hsa-miR-592,hsa-miR-7114-5p,hsa-miR-548av-3p,hsa-miR-6837-5p,hsa-miR-1257,hsa-miR-4651,hsa-miR-3692-5p,hsa-miR-6873-3p
hsa_circ_IPCE1	hsa_circ_IPCE1	circRNA	NM_006329	FBLN5	protein_coding	3.99228e-07	5.64415e-05	477	20	134	0.149254	110	0.181818	2588	hsa-miR-3619-5p,hsa-miR-608,hsa-miR-6842-5p,hsa-miR-216a-3p,hsa-miR-552-3p,hsa-miR-3120-3p,hsa-miR-125a-3p,hsa-miR-128-3p,hsa-miR-370-3p,hsa-miR-761,hsa-miR-4291,hsa-miR-592,hsa-miR-1252-5p,hsa-miR-6077,hsa-miR-214-3p,hsa-miR-892a,hsa-miR-4651,hsa-miR-6752-5p,hsa-miR-6873-3p,hsa-miR-7110-5p
hsa_circ_IPCE1	hsa_circ_IPCE1	circRNA	NM_001145014	RFPL4A	protein_coding	0.000124111	0.00258542	3240	18	134	0.134328	134	0.134328	2588	hsa-miR-3619-5p,hsa-miR-4690-5p,hsa-miR-6818-3p,hsa-miR-6895-3p,hsa-miR-141-5p,hsa-miR-6891-3p,hsa-miR-145-3p,hsa-miR-4685-5p,hsa-miR-216a-3p,hsa-miR-3134,hsa-miR-128-3p,hsa-miR-6787-3p,hsa-miR-510-5p,hsa-miR-761,hsa-miR-214-3p,hsa-miR-4436b-5p,hsa-miR-6837-5p,hsa-miR-3681-3p
hsa_circ_IPCE1	hsa_circ_IPCE1	circRNA	NM_020457	THAP11	protein_coding	7.98108e-06	0.000394056	1367	20	134	0.149254	132	0.151515	2588	hsa-miR-3619-5p,hsa-miR-4646-5p,hsa-miR-4533,hsa-miR-4685-5p,hsa-miR-216a-3p,hsa-miR-6876-5p,hsa-miR-3173-3p,hsa-miR-766-5p,hsa-miR-128-3p,hsa-miR-6891-5p,hsa-miR-204-3p,hsa-miR-3605-5p,hsa-miR-761,hsa-miR-4291,hsa-miR-1252-5p,hsa-miR-214-3p,hsa-miR-4436b-5p,hsa-miR-6837-5p,hsa-miR-4476,hsa-miR-3681-3p
hsa_circ_IPCE1	hsa_circ_IPCE1	circRNA	NM_012140	SLC25A10	protein_coding	1.10752e-05	0.000491614	1516	22	134	0.164179	158	0.139241	2588	hsa-miR-3619-5p,hsa-miR-608,hsa-miR-6842-5p,hsa-miR-1262,hsa-miR-3166,hsa-miR-3173-3p,hsa-miR-6736-5p,hsa-miR-766-5p,hsa-miR-370-3p,hsa-miR-6891-5p,hsa-miR-7113-5p,hsa-miR-3605-5p,hsa-miR-761,hsa-miR-4291,hsa-miR-4689,hsa-miR-922,hsa-miR-1266-3p,hsa-miR-214-3p,hsa-miR-4530,hsa-miR-4651,hsa-miR-3692-5p,hsa-miR-6752-5p
hsa_circ_IPCE1	hsa_circ_IPCE1	circRNA	NM_016274	PLEKHO1	protein_coding	2.96385e-06	0.000204542	978	18	134	0.134328	103	0.174757	2588	hsa-miR-5589-5p,hsa-miR-608,hsa-miR-4298,hsa-miR-6891-3p,hsa-miR-6838-5p,hsa-miR-552-3p,hsa-miR-4505,hsa-miR-125a-3p,hsa-miR-5787,hsa-miR-497-5p,hsa-miR-3074-5p,hsa-miR-6072,hsa-miR-4711-3p,hsa-miR-4530,hsa-miR-892a,hsa-miR-4651,hsa-miR-1302,hsa-miR-6873-3p
hsa_circ_IPCE1	hsa_circ_IPCE1	circRNA	NM_018354	TMEM74B	protein_coding	6.55198e-08	1.63785e-05	270	18	134	0.134328	81	0.222222	2588	hsa-miR-608,hsa-miR-6842-5p,hsa-miR-16-5p,hsa-miR-3692-3p,hsa-miR-195-5p,hsa-miR-15a-5p,hsa-miR-4685-5p,hsa-miR-6838-5p,hsa-miR-15b-5p,hsa-miR-6787-3p,hsa-miR-5787,hsa-miR-497-5p,hsa-miR-922,hsa-miR-424-5p,hsa-miR-3918,hsa-miR-6837-5p,hsa-miR-4651,hsa-miR-6752-5p
hsa_circ_IPCE1	hsa_circ_IPCE1	circRNA	NM_001004453	OR1L6	protein_coding	9.81633e-07	0.000100751	655	25	134	0.186567	171	0.146199	2588	hsa-miR-3619-5p,hsa-miR-5589-5p,hsa-miR-4690-5p,hsa-miR-4647,hsa-miR-6776-5p,hsa-miR-6818-3p,hsa-miR-4662b,hsa-miR-216a-3p,hsa-miR-6876-5p,hsa-miR-4505,hsa-miR-4742-5p,hsa-miR-128-3p,hsa-miR-6732-5p,hsa-miR-5787,hsa-miR-3605-5p,hsa-miR-761,hsa-miR-592,hsa-miR-1298-3p,hsa-miR-6077,hsa-miR-214-3p,hsa-miR-4436b-5p,hsa-miR-4530,hsa-miR-4476,hsa-miR-892a,hsa-miR-3681-3p
hsa_circ_IPCE1	hsa_circ_IPCE1	circRNA	NM_001006938	TCEAL6	protein_coding	5.43172e-07	6.83971e-05	536	19	134	0.141791	102	0.186275	2588	hsa-miR-6894-3p,hsa-miR-16-5p,hsa-miR-195-5p,hsa-miR-15a-5p,hsa-miR-4668-3p,hsa-miR-1262,hsa-miR-6838-5p,hsa-miR-552-3p,hsa-miR-6736-5p,hsa-miR-125a-3p,hsa-miR-15b-5p,hsa-miR-9500,hsa-miR-7113-5p,hsa-miR-497-5p,hsa-miR-922,hsa-miR-424-5p,hsa-miR-4762-3p,hsa-miR-4711-3p,hsa-miR-3692-5p
hsa_circ_IPCE1	hsa_circ_IPCE1	circRNA	NM_006939	SOS2	protein_coding	3.78853e-06	0.000238307	1073	21	134	0.156716	137	0.153285	2588	hsa-miR-4647,hsa-miR-1323,hsa-miR-548g-3p,hsa-miR-545-3p,hsa-miR-4662b,hsa-miR-16-5p,hsa-miR-195-5p,hsa-miR-15a-5p,hsa-miR-6838-5p,hsa-miR-548e-5p,hsa-miR-15b-5p,hsa-miR-3605-5p,hsa-miR-497-5p,hsa-miR-4676-3p,hsa-miR-4291,hsa-miR-5089-3p,hsa-miR-4426,hsa-miR-452-5p,hsa-miR-424-5p,hsa-miR-6809-5p,hsa-miR-892c-3p
hsa_circ_IPCE1	hsa_circ_IPCE1	circRNA	NM_198479	TPRX1	protein_coding	5.17115e-07	6.66922e-05	523	18	134	0.134328	92	0.195652	2588	hsa-miR-3619-5p,hsa-miR-545-3p,hsa-miR-4646-5p,hsa-miR-16-5p,hsa-miR-195-5p,hsa-miR-15a-5p,hsa-miR-216a-3p,hsa-miR-6838-5p,hsa-miR-3120-3p,hsa-miR-128-3p,hsa-miR-15b-5p,hsa-miR-204-3p,hsa-miR-497-5p,hsa-miR-761,hsa-miR-922,hsa-miR-424-5p,hsa-miR-214-3p,hsa-miR-4530
hsa_circ_IPCE1	hsa_circ_IPCE1	circRNA	NM_030764	FCRL2	protein_coding	3.00241e-07	4.75692e-05	426	24	134	0.179104	150	0.16	2588	hsa-miR-548g-3p,hsa-miR-16-5p,hsa-miR-195-5p,hsa-miR-15a-5p,hsa-miR-216a-3p,hsa-miR-6838-5p,hsa-miR-3173-3p,hsa-miR-125a-3p,hsa-miR-766-5p,hsa-miR-128-3p,hsa-miR-15b-5p,hsa-miR-370-3p,hsa-miR-6891-5p,hsa-miR-497-5p,hsa-miR-5586-5p,hsa-miR-1266-3p,hsa-miR-424-5p,hsa-miR-6077,hsa-miR-5706,hsa-miR-4530,hsa-miR-3681-3p,hsa-miR-4782-5p,hsa-miR-6747-3p,hsa-miR-6893-3p
hsa_circ_IPCE1	hsa_circ_IPCE1	circRNA	NM_001005190	OR7A10	protein_coding	6.40828e-07	7.52329e-05	574	24	134	0.179104	156	0.153846	2588	hsa-miR-6776-5p,hsa-miR-6842-5p,hsa-miR-4701-3p,hsa-miR-1262,hsa-miR-216a-3p,hsa-miR-6876-5p,hsa-miR-552-3p,hsa-miR-3173-3p,hsa-miR-4742-5p,hsa-miR-6736-5p,hsa-miR-766-5p,hsa-miR-128-3p,hsa-miR-640,hsa-miR-1468-3p,hsa-miR-6891-5p,hsa-miR-922,hsa-miR-1252-5p,hsa-miR-1298-3p,hsa-miR-4530,hsa-miR-4476,hsa-miR-3681-3p,hsa-miR-6752-5p,hsa-miR-4782-5p,hsa-miR-7110-5p
hsa_circ_IPCE1	hsa_circ_IPCE1	circRNA	NM_024619	FN3KRP	protein_coding	6.27072e-06	0.000336385	1256	20	134	0.149254	130	0.153846	2588	hsa-miR-4647,hsa-miR-6818-3p,hsa-miR-4662b,hsa-miR-16-5p,hsa-miR-195-5p,hsa-miR-15a-5p,hsa-miR-4533,hsa-miR-6838-5p,hsa-miR-6876-5p,hsa-miR-15b-5p,hsa-miR-7113-5p,hsa-miR-497-5p,hsa-miR-3074-5p,hsa-miR-424-5p,hsa-miR-1252-5p,hsa-miR-7114-5p,hsa-miR-4530,hsa-miR-4476,hsa-miR-4753-3p,hsa-miR-6747-3p
hsa_circ_IPCE1	hsa_circ_IPCE1	circRNA	NM_001005278	OR6N2	protein_coding	1.10752e-05	0.000491614	1517	22	134	0.164179	158	0.139241	2588	hsa-miR-3619-5p,hsa-miR-4647,hsa-miR-545-3p,hsa-miR-433-3p,hsa-miR-4298,hsa-miR-4662b,hsa-miR-16-5p,hsa-miR-195-5p,hsa-miR-15a-5p,hsa-miR-6838-5p,hsa-miR-3120-3p,hsa-miR-3173-3p,hsa-miR-15b-5p,hsa-miR-889-5p,hsa-miR-497-5p,hsa-miR-761,hsa-miR-4426,hsa-miR-424-5p,hsa-miR-1252-5p,hsa-miR-214-3p,hsa-miR-6809-5p,hsa-miR-1302
hsa_circ_IPCE1	hsa_circ_IPCE1	circRNA	NM_001280796	GLS2	protein_coding	3.95715e-06	0.00024622	1084	18	134	0.134328	105	0.171429	2588	hsa-miR-6776-5p,hsa-miR-4752,hsa-miR-433-3p,hsa-miR-16-5p,hsa-miR-195-5p,hsa-miR-15a-5p,hsa-miR-4701-3p,hsa-miR-1262,hsa-miR-6838-5p,hsa-miR-6736-5p,hsa-miR-15b-5p,hsa-miR-497-5p,hsa-miR-424-5p,hsa-miR-7114-5p,hsa-miR-5706,hsa-miR-3921,hsa-miR-4782-5p,hsa-miR-6873-3p
hsa_circ_IPCE1	hsa_circ_IPCE1	circRNA	NM_005119	THRAP3	protein_coding	1.01641e-06	0.000102118	670	26	134	0.19403	183	0.142077	2588	hsa-miR-3619-5p,hsa-miR-1323,hsa-miR-608,hsa-miR-6842-5p,hsa-miR-16-5p,hsa-miR-195-5p,hsa-miR-15a-5p,hsa-miR-4668-3p,hsa-miR-130b-5p,hsa-miR-6838-5p,hsa-miR-4505,hsa-miR-15b-5p,hsa-miR-6891-5p,hsa-miR-7113-5p,hsa-miR-5787,hsa-miR-497-5p,hsa-miR-761,hsa-miR-4291,hsa-miR-424-5p,hsa-miR-214-3p,hsa-miR-4779,hsa-miR-4651,hsa-miR-3692-5p,hsa-miR-6752-5p,hsa-miR-4753-3p,hsa-miR-7110-5p
hsa_circ_IPCE1	hsa_circ_IPCE1	circRNA	NM_016490	FAM178B	protein_coding	6.25885e-06	0.000336385	1251	19	134	0.141791	119	0.159664	2588	hsa-miR-608,hsa-miR-4533,hsa-miR-6876-5p,hsa-miR-4505,hsa-miR-3173-3p,hsa-miR-9500,hsa-miR-370-3p,hsa-miR-6891-5p,hsa-miR-7113-5p,hsa-miR-889-5p,hsa-miR-5787,hsa-miR-3074-5p,hsa-miR-1266-3p,hsa-miR-6077,hsa-miR-6072,hsa-miR-4779,hsa-miR-4476,hsa-miR-4651,hsa-miR-6893-3p
hsa_circ_IPCE1	hsa_circ_IPCE1	circRNA	NM_001165412	NFKB1	protein_coding	1.89176e-06	0.000151462	843	18	134	0.134328	100	0.18	2588	hsa-miR-16-5p,hsa-miR-195-5p,hsa-miR-15a-5p,hsa-miR-6891-3p,hsa-miR-6838-5p,hsa-miR-3120-3p,hsa-miR-548e-5p,hsa-miR-15b-5p,hsa-miR-640,hsa-miR-1468-3p,hsa-miR-497-5p,hsa-miR-5586-5p,hsa-miR-424-5p,hsa-miR-6072,hsa-miR-4530,hsa-miR-3921,hsa-miR-4753-3p,hsa-miR-4653-5p
hsa_circ_IPCE1	hsa_circ_IPCE1	circRNA	NM_152789	FAM133B	protein_coding	3.41732e-07	5.17266e-05	445	24	134	0.179104	151	0.15894	2588	hsa-miR-3619-5p,hsa-miR-4690-5p,hsa-miR-6858-5p,hsa-miR-16-5p,hsa-miR-195-5p,hsa-miR-15a-5p,hsa-miR-216a-3p,hsa-miR-6838-5p,hsa-miR-3120-3p,hsa-miR-4742-5p,hsa-miR-128-3p,hsa-miR-15b-5p,hsa-miR-1468-3p,hsa-miR-889-5p,hsa-miR-6787-3p,hsa-miR-497-5p,hsa-miR-761,hsa-miR-4291,hsa-miR-4689,hsa-miR-424-5p,hsa-miR-214-3p,hsa-miR-892a,hsa-miR-3681-3p,hsa-miR-3692-5p
hsa_circ_IPCE1	hsa_circ_IPCE1	circRNA	NM_001080511	CLEC2L	protein_coding	1.59407e-05	0.00062191	1730	20	134	0.149254	138	0.144928	2588	hsa-miR-3619-5p,hsa-miR-5589-5p,hsa-miR-6776-5p,hsa-miR-608,hsa-miR-6858-5p,hsa-miR-4701-3p,hsa-miR-1262,hsa-miR-4685-5p,hsa-miR-3166,hsa-miR-3173-3p,hsa-miR-6736-5p,hsa-miR-6891-5p,hsa-miR-7113-5p,hsa-miR-4689,hsa-miR-3918,hsa-miR-6837-5p,hsa-miR-6809-5p,hsa-miR-4651,hsa-miR-3692-5p,hsa-miR-6747-3p
hsa_circ_IPCE1	hsa_circ_IPCE1	circRNA	NM_030901	OR7A17	protein_coding	1.92014e-08	7.49122e-06	173	29	134	0.216418	184	0.157609	2588	hsa-miR-3691-5p,hsa-miR-6776-5p,hsa-miR-608,hsa-miR-6842-5p,hsa-miR-433-3p,hsa-miR-4701-3p,hsa-miR-1262,hsa-miR-216a-3p,hsa-miR-6876-5p,hsa-miR-552-3p,hsa-miR-4742-5p,hsa-miR-548e-5p,hsa-miR-6736-5p,hsa-miR-766-5p,hsa-miR-128-3p,hsa-miR-370-3p,hsa-miR-3605-5p,hsa-miR-922,hsa-miR-4312,hsa-miR-1298-3p,hsa-miR-4476,hsa-miR-6809-5p,hsa-miR-3681-3p,hsa-miR-4504,hsa-miR-4651,hsa-miR-6752-5p,hsa-miR-478…
hsa_circ_IPCE1	hsa_circ_IPCE1	circRNA	NM_177551	HCAR2	protein_coding	9.17549e-05	0.00211146	2933	18	134	0.134328	131	0.137405	2588	hsa-miR-4690-5p,hsa-miR-195-5p,hsa-miR-15a-5p,hsa-miR-145-3p,hsa-miR-6838-5p,hsa-miR-548e-5p,hsa-miR-125a-3p,hsa-miR-766-5p,hsa-miR-15b-5p,hsa-miR-6787-3p,hsa-miR-497-5p,hsa-miR-3074-5p,hsa-miR-4676-3p,hsa-miR-4291,hsa-miR-922,hsa-miR-452-5p,hsa-miR-424-5p,hsa-miR-892c-3p
hsa_circ_IPCE1	hsa_circ_IPCE1	circRNA	NM_014517	UBP1	protein_coding	6.92606e-08	1.71863e-05	272	35	134	0.261194	267	0.131086	2588	hsa-miR-3619-5p,hsa-miR-4314,hsa-miR-4690-5p,hsa-miR-6894-3p,hsa-miR-3681-5p,hsa-miR-608,hsa-miR-6858-5p,hsa-miR-6842-5p,hsa-miR-4646-5p,hsa-miR-4298,hsa-miR-16-5p,hsa-miR-195-5p,hsa-miR-15a-5p,hsa-miR-4668-3p,hsa-miR-3166,hsa-miR-3120-3p,hsa-miR-4742-5p,hsa-miR-4742-3p,hsa-miR-766-5p,hsa-miR-15b-5p,hsa-miR-9500,hsa-miR-204-3p,hsa-miR-3605-5p,hsa-miR-497-5p,hsa-miR-761,hsa-miR-4689,hsa-miR-424-5p…
hsa_circ_IPCE1	hsa_circ_IPCE1	circRNA	NM_001005467	OR8B3	protein_coding	1.51158e-05	0.000602971	1692	22	134	0.164179	161	0.136646	2588	hsa-miR-3681-5p,hsa-miR-545-3p,hsa-miR-4298,hsa-miR-141-5p,hsa-miR-16-5p,hsa-miR-195-5p,hsa-miR-15a-5p,hsa-miR-6838-5p,hsa-miR-8056,hsa-miR-3120-3p,hsa-miR-15b-5p,hsa-miR-3605-5p,hsa-miR-497-5p,hsa-miR-5586-5p,hsa-miR-6853-3p,hsa-miR-424-5p,hsa-miR-5706,hsa-miR-4779,hsa-miR-4504,hsa-miR-1302,hsa-miR-6849-5p,hsa-miR-4782-5p
hsa_circ_IPCE1	hsa_circ_IPCE1	circRNA	NM_007364	TMED3	protein_coding	9.14605e-07	9.6756e-05	638	21	134	0.156716	126	0.166667	2588	hsa-miR-4690-5p,hsa-miR-16-5p,hsa-miR-15a-5p,hsa-miR-4685-5p,hsa-miR-216a-3p,hsa-miR-6838-5p,hsa-miR-128-3p,hsa-miR-15b-5p,hsa-miR-889-5p,hsa-miR-497-5p,hsa-miR-761,hsa-miR-3074-5p,hsa-miR-4512,hsa-miR-424-5p,hsa-miR-4762-3p,hsa-miR-3918,hsa-miR-214-3p,hsa-miR-6837-5p,hsa-miR-4530,hsa-miR-3681-3p,hsa-miR-3921
#
